# Supplementary material for: Quantifying the Ultimate Limit of Plasmonic Near-field Enhancement
Source: Research Square preprint supplement (doi:10.21203/rs.3.rs-4300209/v1), 2024-05-08
Supplement: Supplementary file 1 [file 3b9ef53fc0fd7cc9f08f8581.docx]

**Supplementary Information for**

**Quantifying the Ultimate Limit of Plasmonic Field Enhancement**

Zhengyi Lu1, Jiamin Ji1, Haiming Ye1, Hao Zhang1, Shunping Zhang1, 2, *, Hongxing Xu1, 2, 3, 4

1School of Physics and Technology and Key Laboratory of Artificial Micro- and Nano-structures of Ministry of Education, Wuhan University, Wuhan 430072, China.

2Wuhan Institute of Quantum Technology, Wuhan 430206, China.

3School of Microelectronics, Wuhan University, Wuhan 430072, China.

4Henan Academy of Sciences, Zhengzhou 450046, Henan, China

**S1 Synthesis and characterization of Ag nanocubes and Ag film**

Ag nanocubes were synthesized by the seed-mediated method. Ice-cooled NaBH4 aqueous solution (0.6 mL, 10 mM) was quickly added into a mixture of HAuCl4 (5 mL, 0.5 mM) and cetyltrimethylammonium chloride (CTAC) (5 mL, 200 mM) aqueous solutions. After an undisturbed reaction for 3 h at 27 °C, a 3 nm Au nanoseeds solution was successfully synthesized. Then, HAuCl4 (6 mL, 0.5 mM), CTAC (6 mL, 200 mM), and ascorbic acid (AA) (4.5 mL, 100 mM) aqueous solutions were mixed, followed by the addition of 3 nm Au nanoseeds (0.15 mL). The mixture produces 10 nm Au nanoseeds through the reaction of 15 minutes at 27 ℃. Finally, 10 nm Au nanoseeds (0.1 mL, 20 mM) and CTAC (10 mL, 20 mM) aqueous solutions were mixed and heated for 20 min at 60 °C under magnetic stirring, AgNO3 (10 mL, 2 mM), AA (5 mL, 100 mM) and CTAC (5 mL, 80 mM) aqueous solutions were simultaneously injected into above mixture with a rate of 0.4 mL/min using a syringe pump. After 4 h, the vials were cooled under an ice bath. Ag nanocubes were collected by twice centrifugation (7500 rpm for 15 min) and finally dispersed into CTAC (4 mL, 20 mM) aqueous solutions.


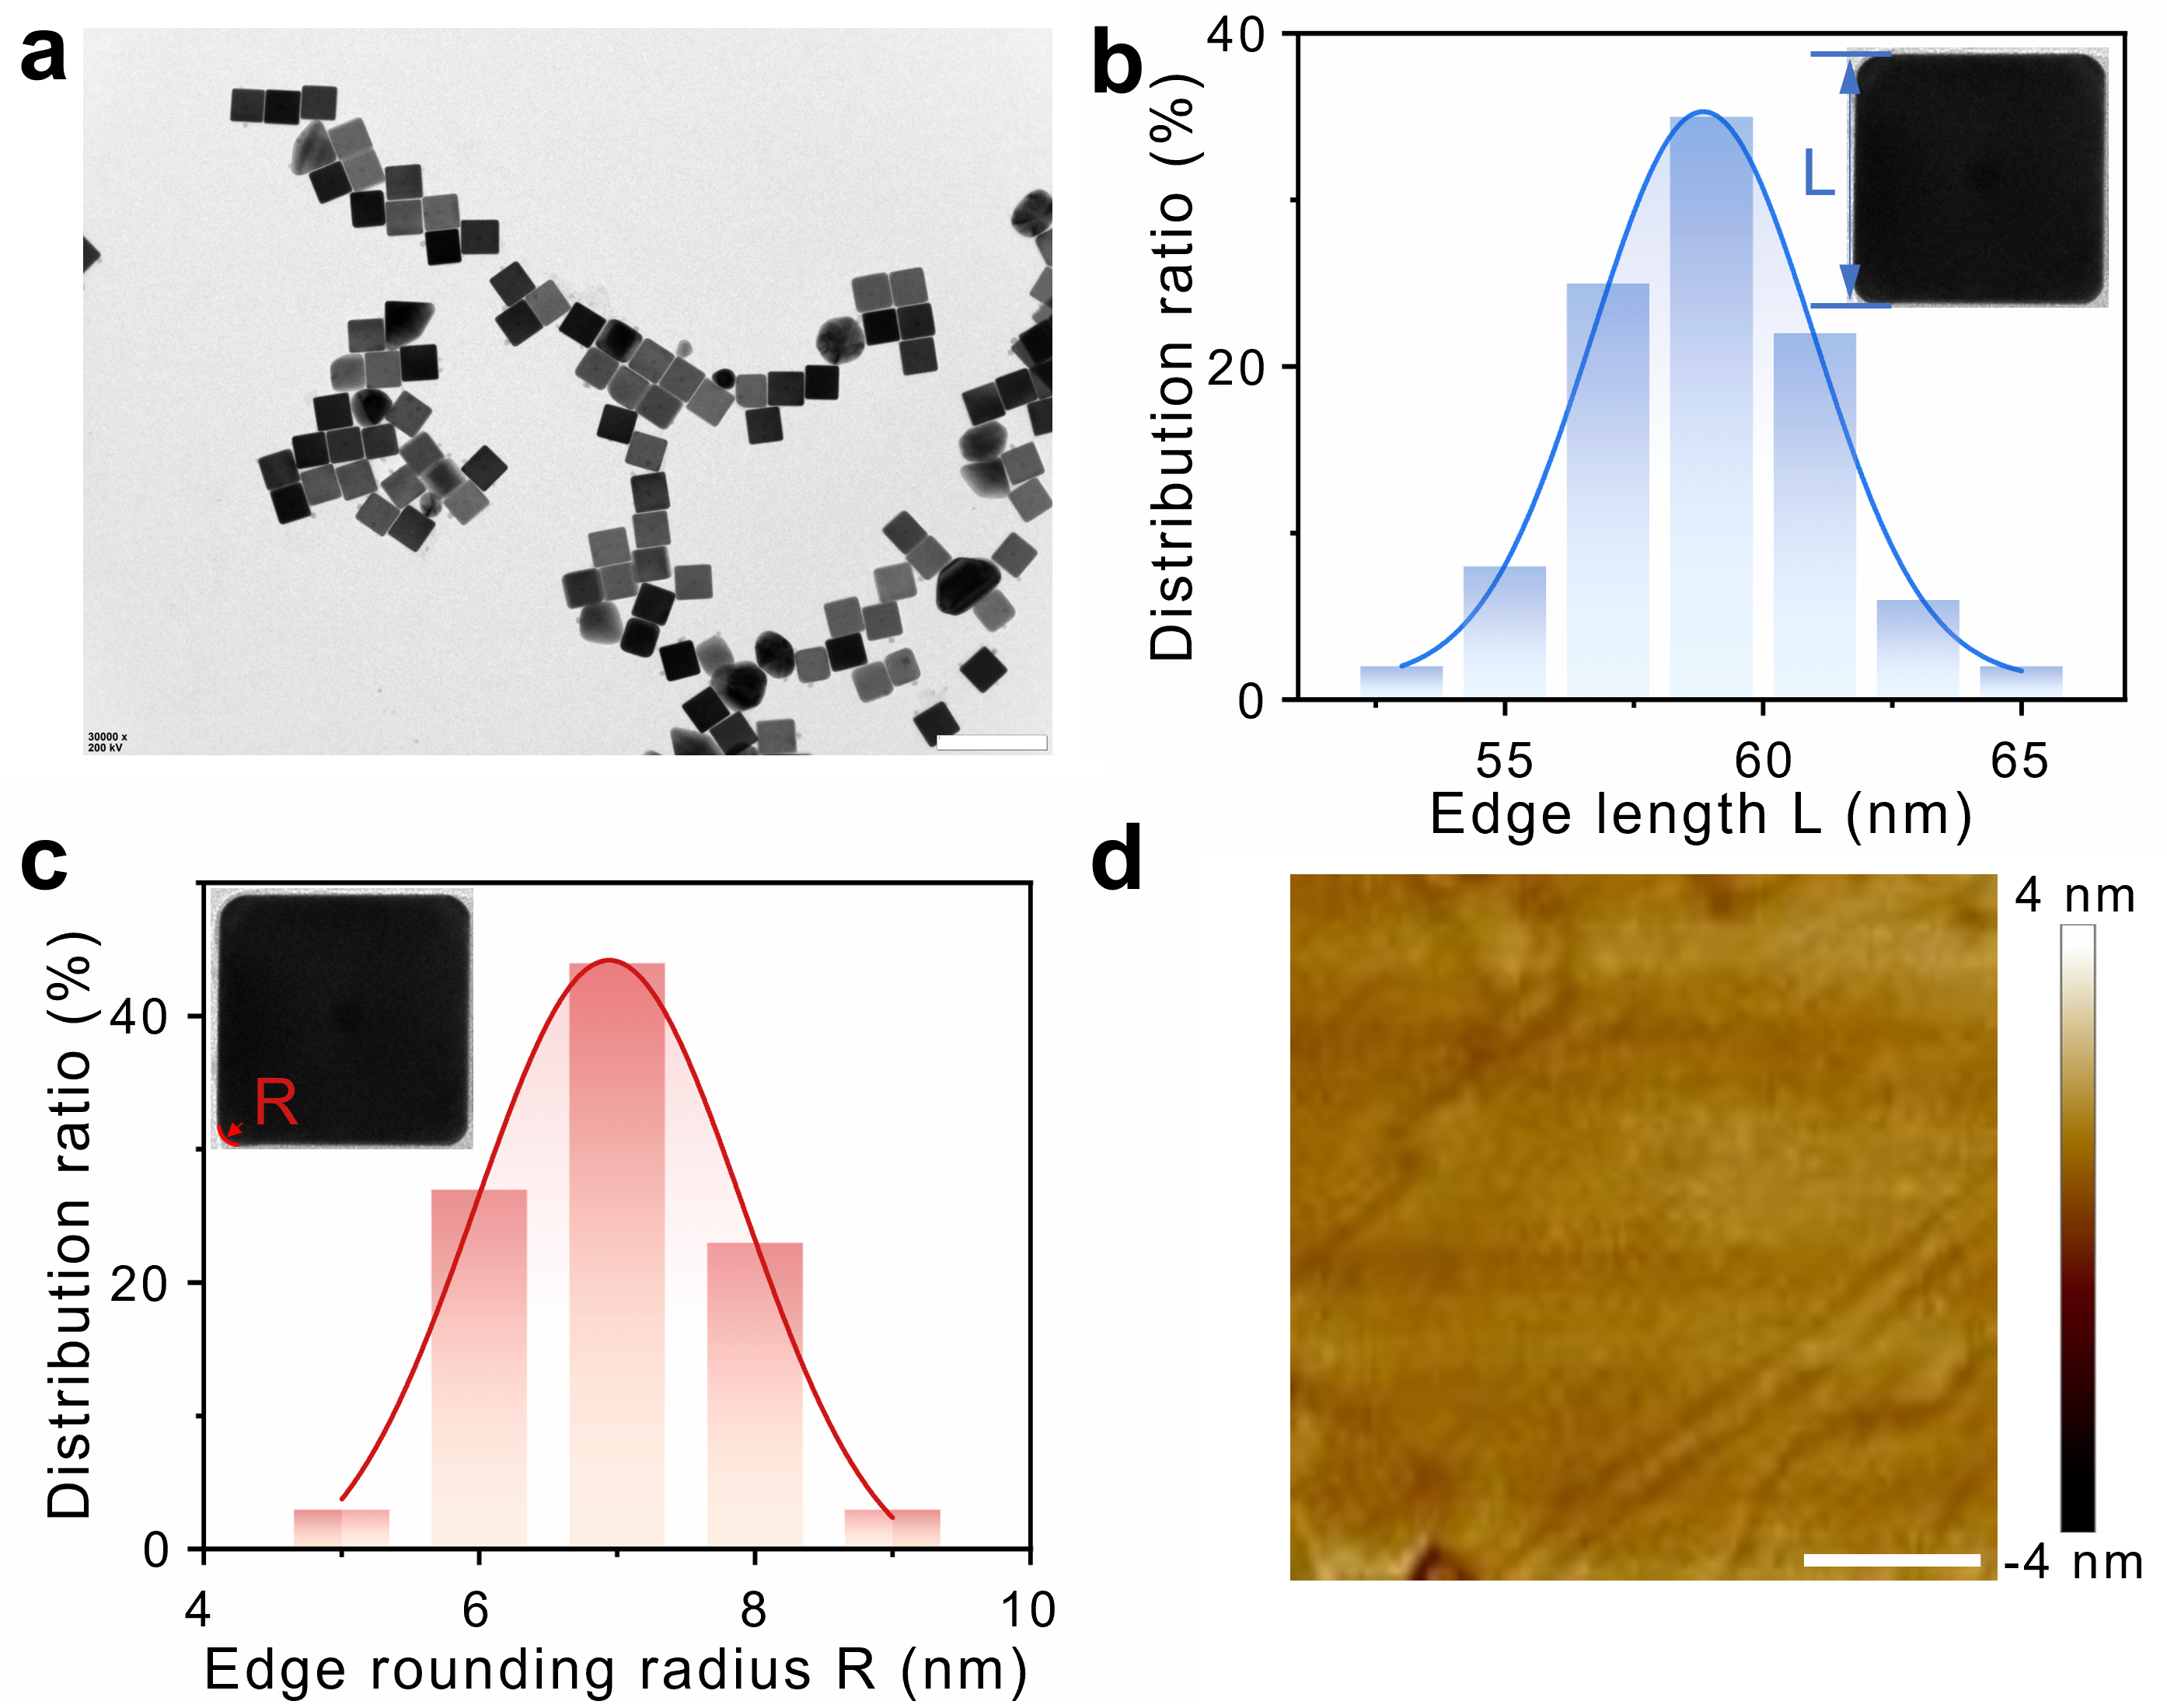


**Fig. S1.** (**a**) TEM image of Ag nanocubes. The scale bar is 200 nm. Statistical histogram about the edge length L (**b**) and the edge rounding radius R (**c**). The insets present the definition of L and R. (**d**) AFM image of the ultra-smooth Ag film. The scale bar is 200 nm.

The TEM image of Ag nanocubes shows an averaged edge length of 58.8 nm with a standard deviation of 5.1 nm (**Fig. S1b**), and an averaged edge rounding radius of 6.7 nm with a standard deviation of 2.3 nm (**Fig. S1c**). The ultra-smooth Ag film was prepared through the template-stripped method, and the root-mean-square (RMS) of surface roughness is 0.40 nm over an area of 800×800 nm² (**Fig. S1d**), measured by the AFM.

**S2 Setup for dark-field scattering and Raman spectroscopy**


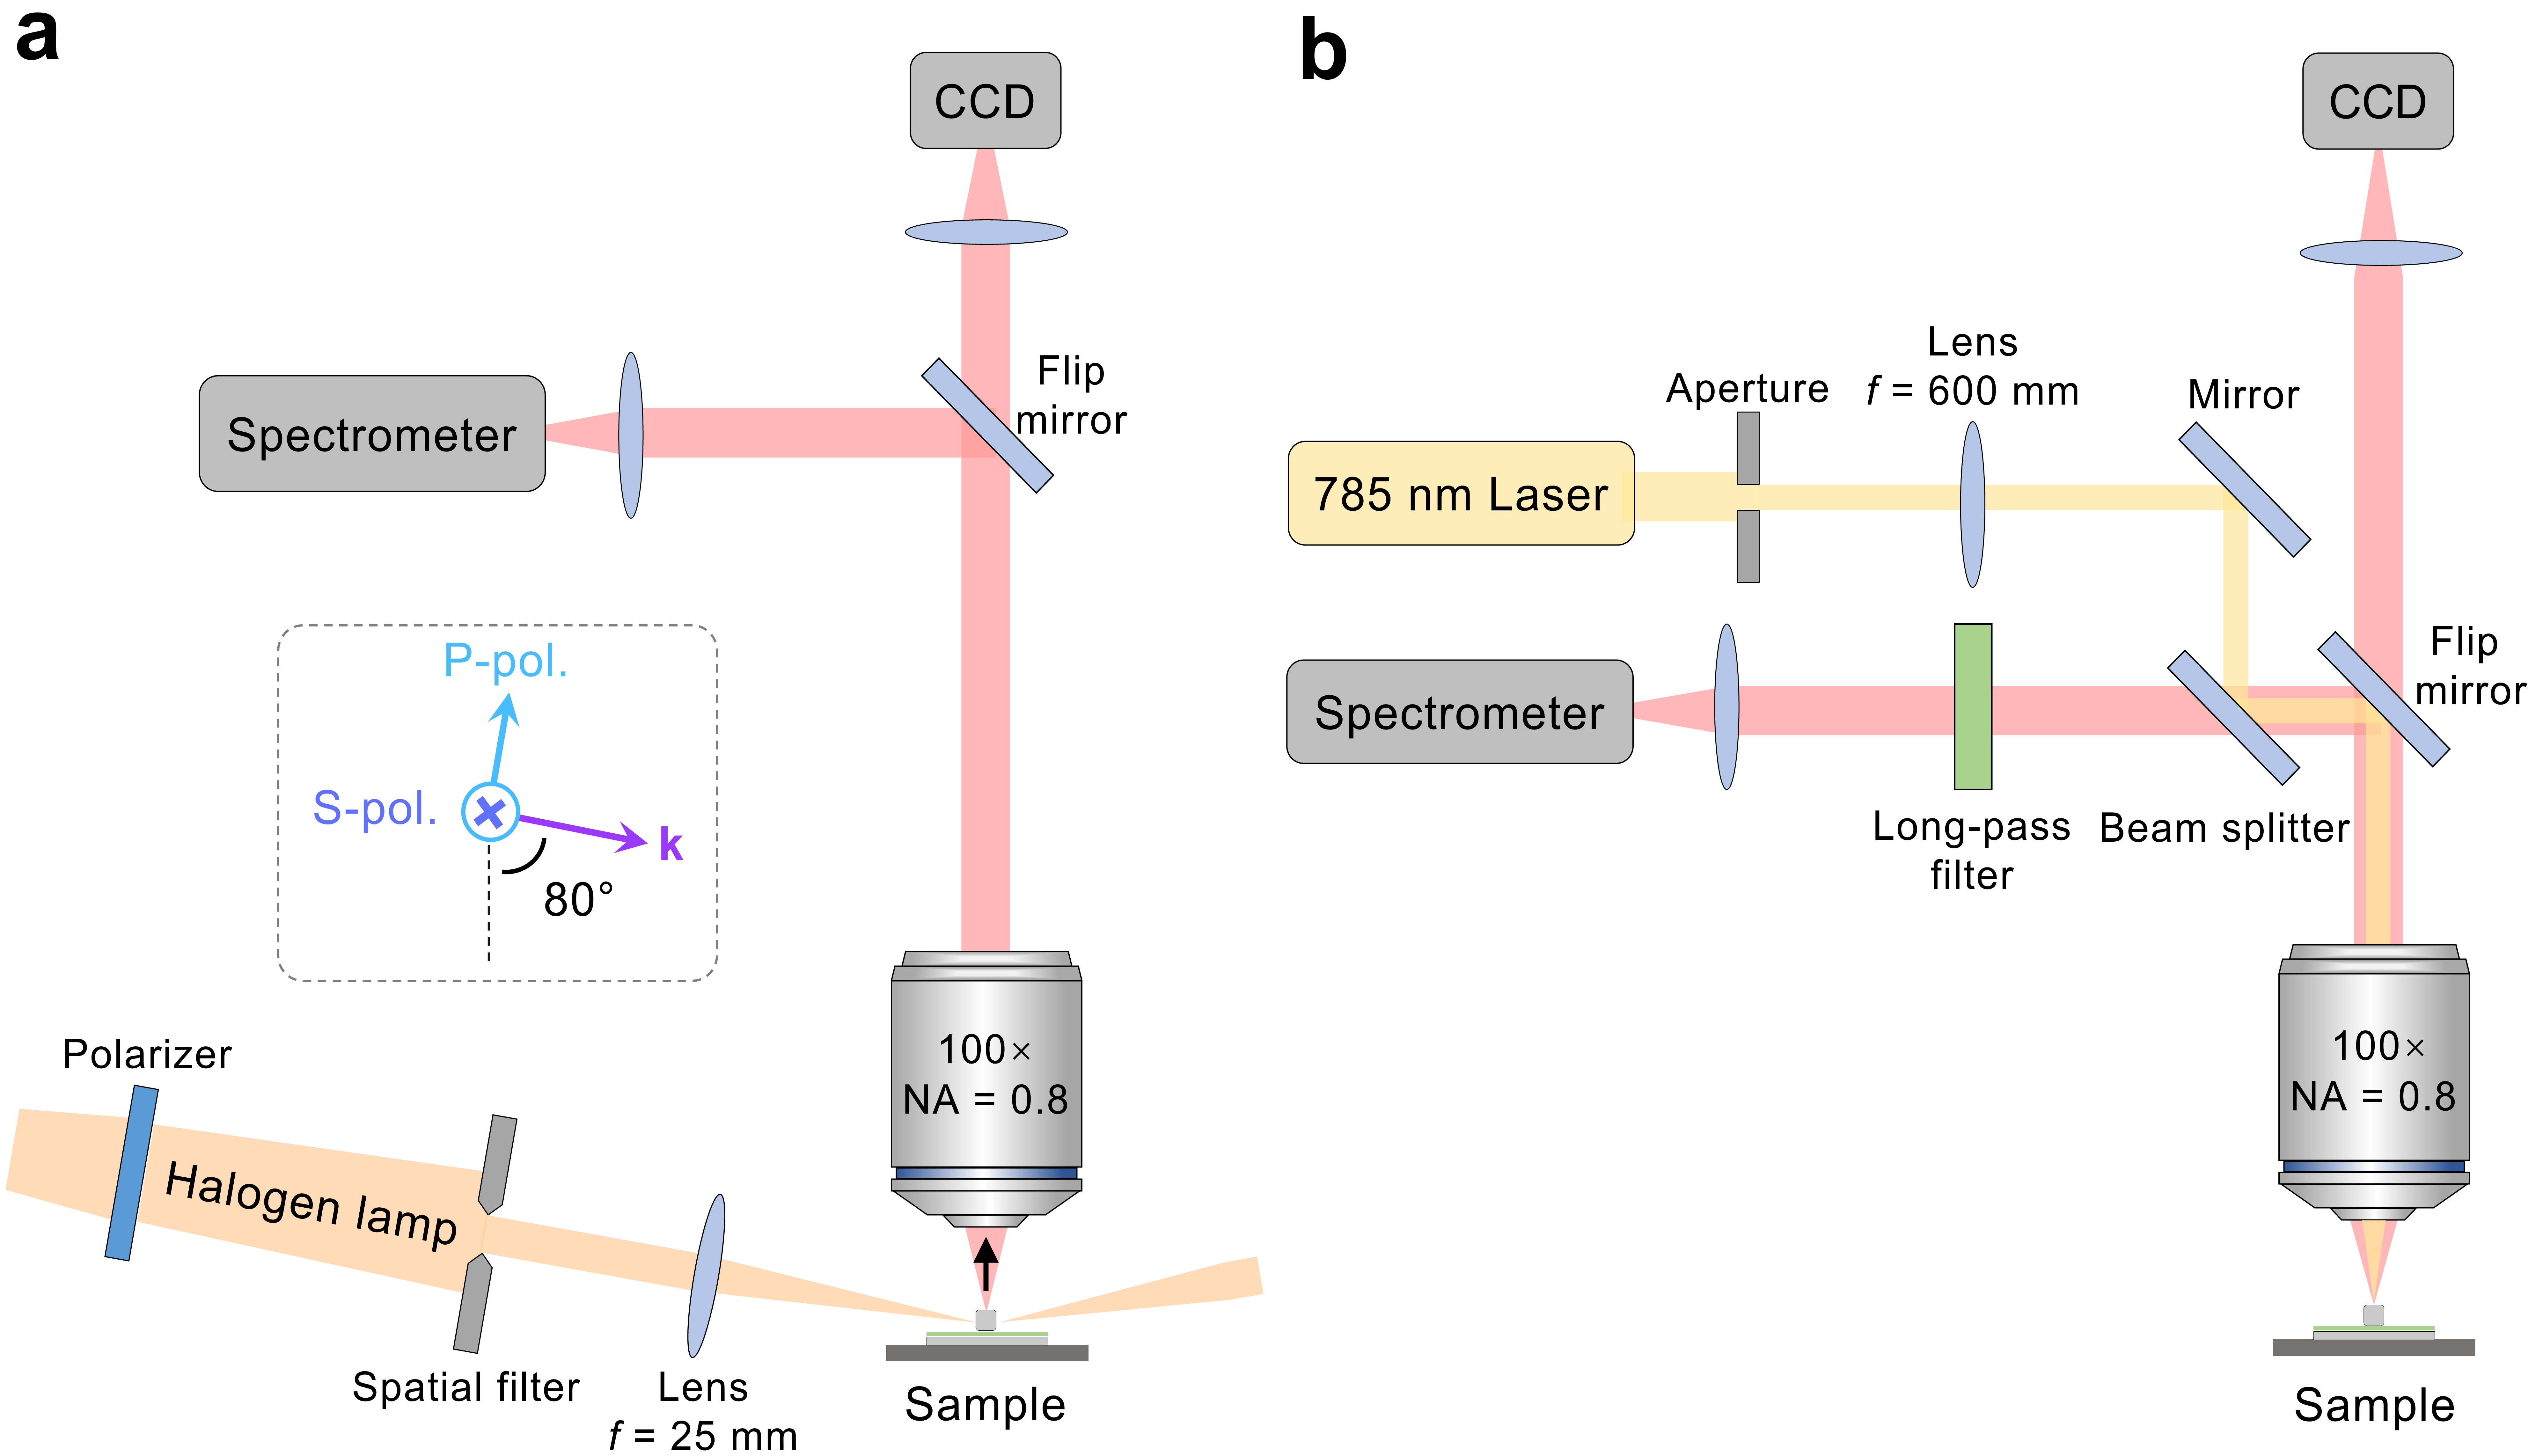


**Fig. S2.** (**a**) Oblique incident setup for dark-field scattering spectroscopy. The gray dashed square shows a schematic of the polarized excitation. (**b**) Normal incident setup for Raman spectroscopy.

**S3 Identification of the number of MoS2 layers**

The optical contrasts, photoluminescence, and Raman spectroscopy were performed to identify the number of MoS2 layers on Ag film. The boundary of MoS2 layers is revealed by the optical contrasts experientially (**Fig. S3a** and **S3b**). The photoluminescence spectrum of 1L MoS2 exhibited the highest intensity with a central wavelength of ~668 nm, compared with 2L and 3L MoS2 (**Fig. S3c**). Additionally, the Raman spectra confirmed the precise number of MoS2 layers by analyzing the frequency difference (Δ) of two characteristic Raman peaks ( mode and mode). The Δ for 1L, 2L, and 3L MoS2 were determined to be 19.2 cm-1, 21.4 cm-1, and 23.5 cm-1 respectively, providing reliable evidence to confirm the precise number of MoS2 layers**23** (**Fig. S3d**).


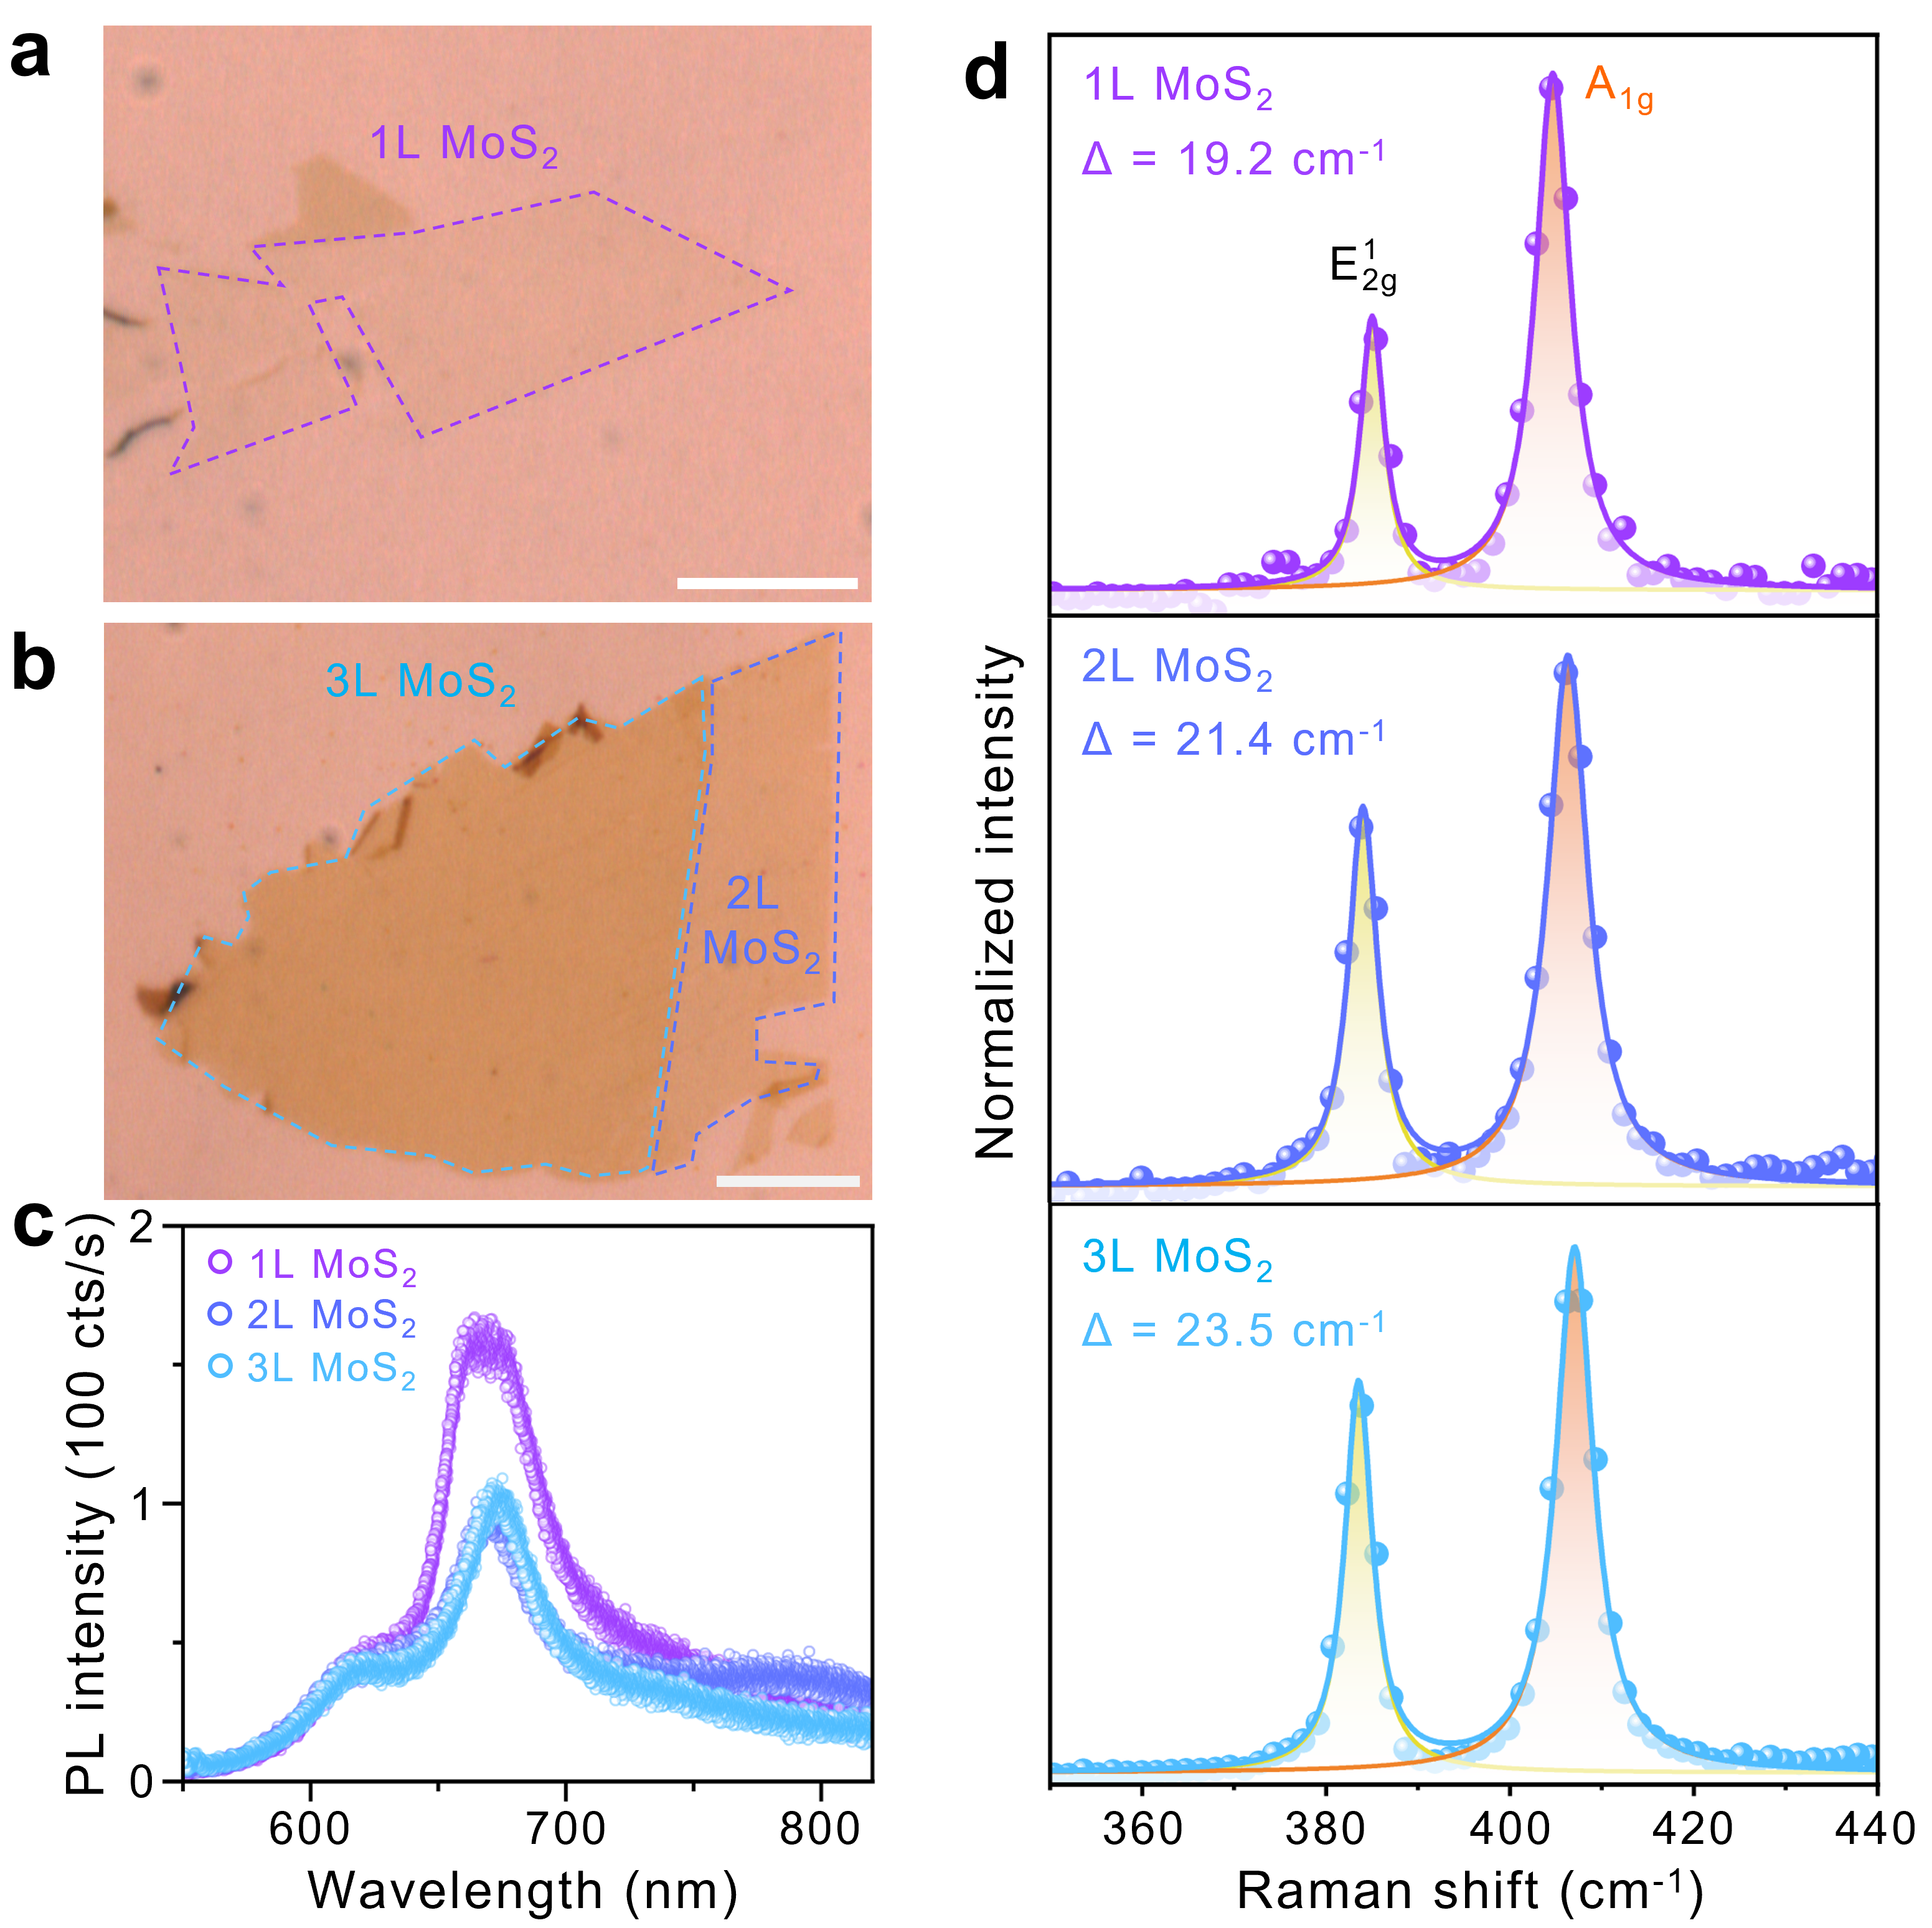


**Fig. S3.** (**a**) and (**b**) represent optical contrasts of 1L, 2L, and 3L MoS2 onto 0.5-nm-thick Al2O3 coated Ag film, respectively. Colorful dashed lines show the boundary of MoS2 layers. Both scale bars are 10 µm. (**c**) Photoluminescence spectra of MoS2 under the excitation of 532 nm laser. (**d**) Normalized Raman spectra of MoS2 marked with the frequency difference, including the Lorentz fitting.

**S4 Dark-field scattering image of 1L-MoS2-NCOM**

With Al2O3 layers gradually coating, the dark-field images of the measured Ag nanocube on 1L-MoS2-NCOM appear a transition from a blue spot with a purple ring to a pure blue spot. Compared with the reported NOPM geometry**19**, our designed NCOM samples provide a clearer dark-field background, and show a higher scattering brightness of individual nanocube. Besides, the M mode is more sensitive to the varied thickness of the Al2O3 coating, so a little coating can shift the resonance peak with a wide spectral range, allowing a subtle wavelength-scanned SERS measurement.


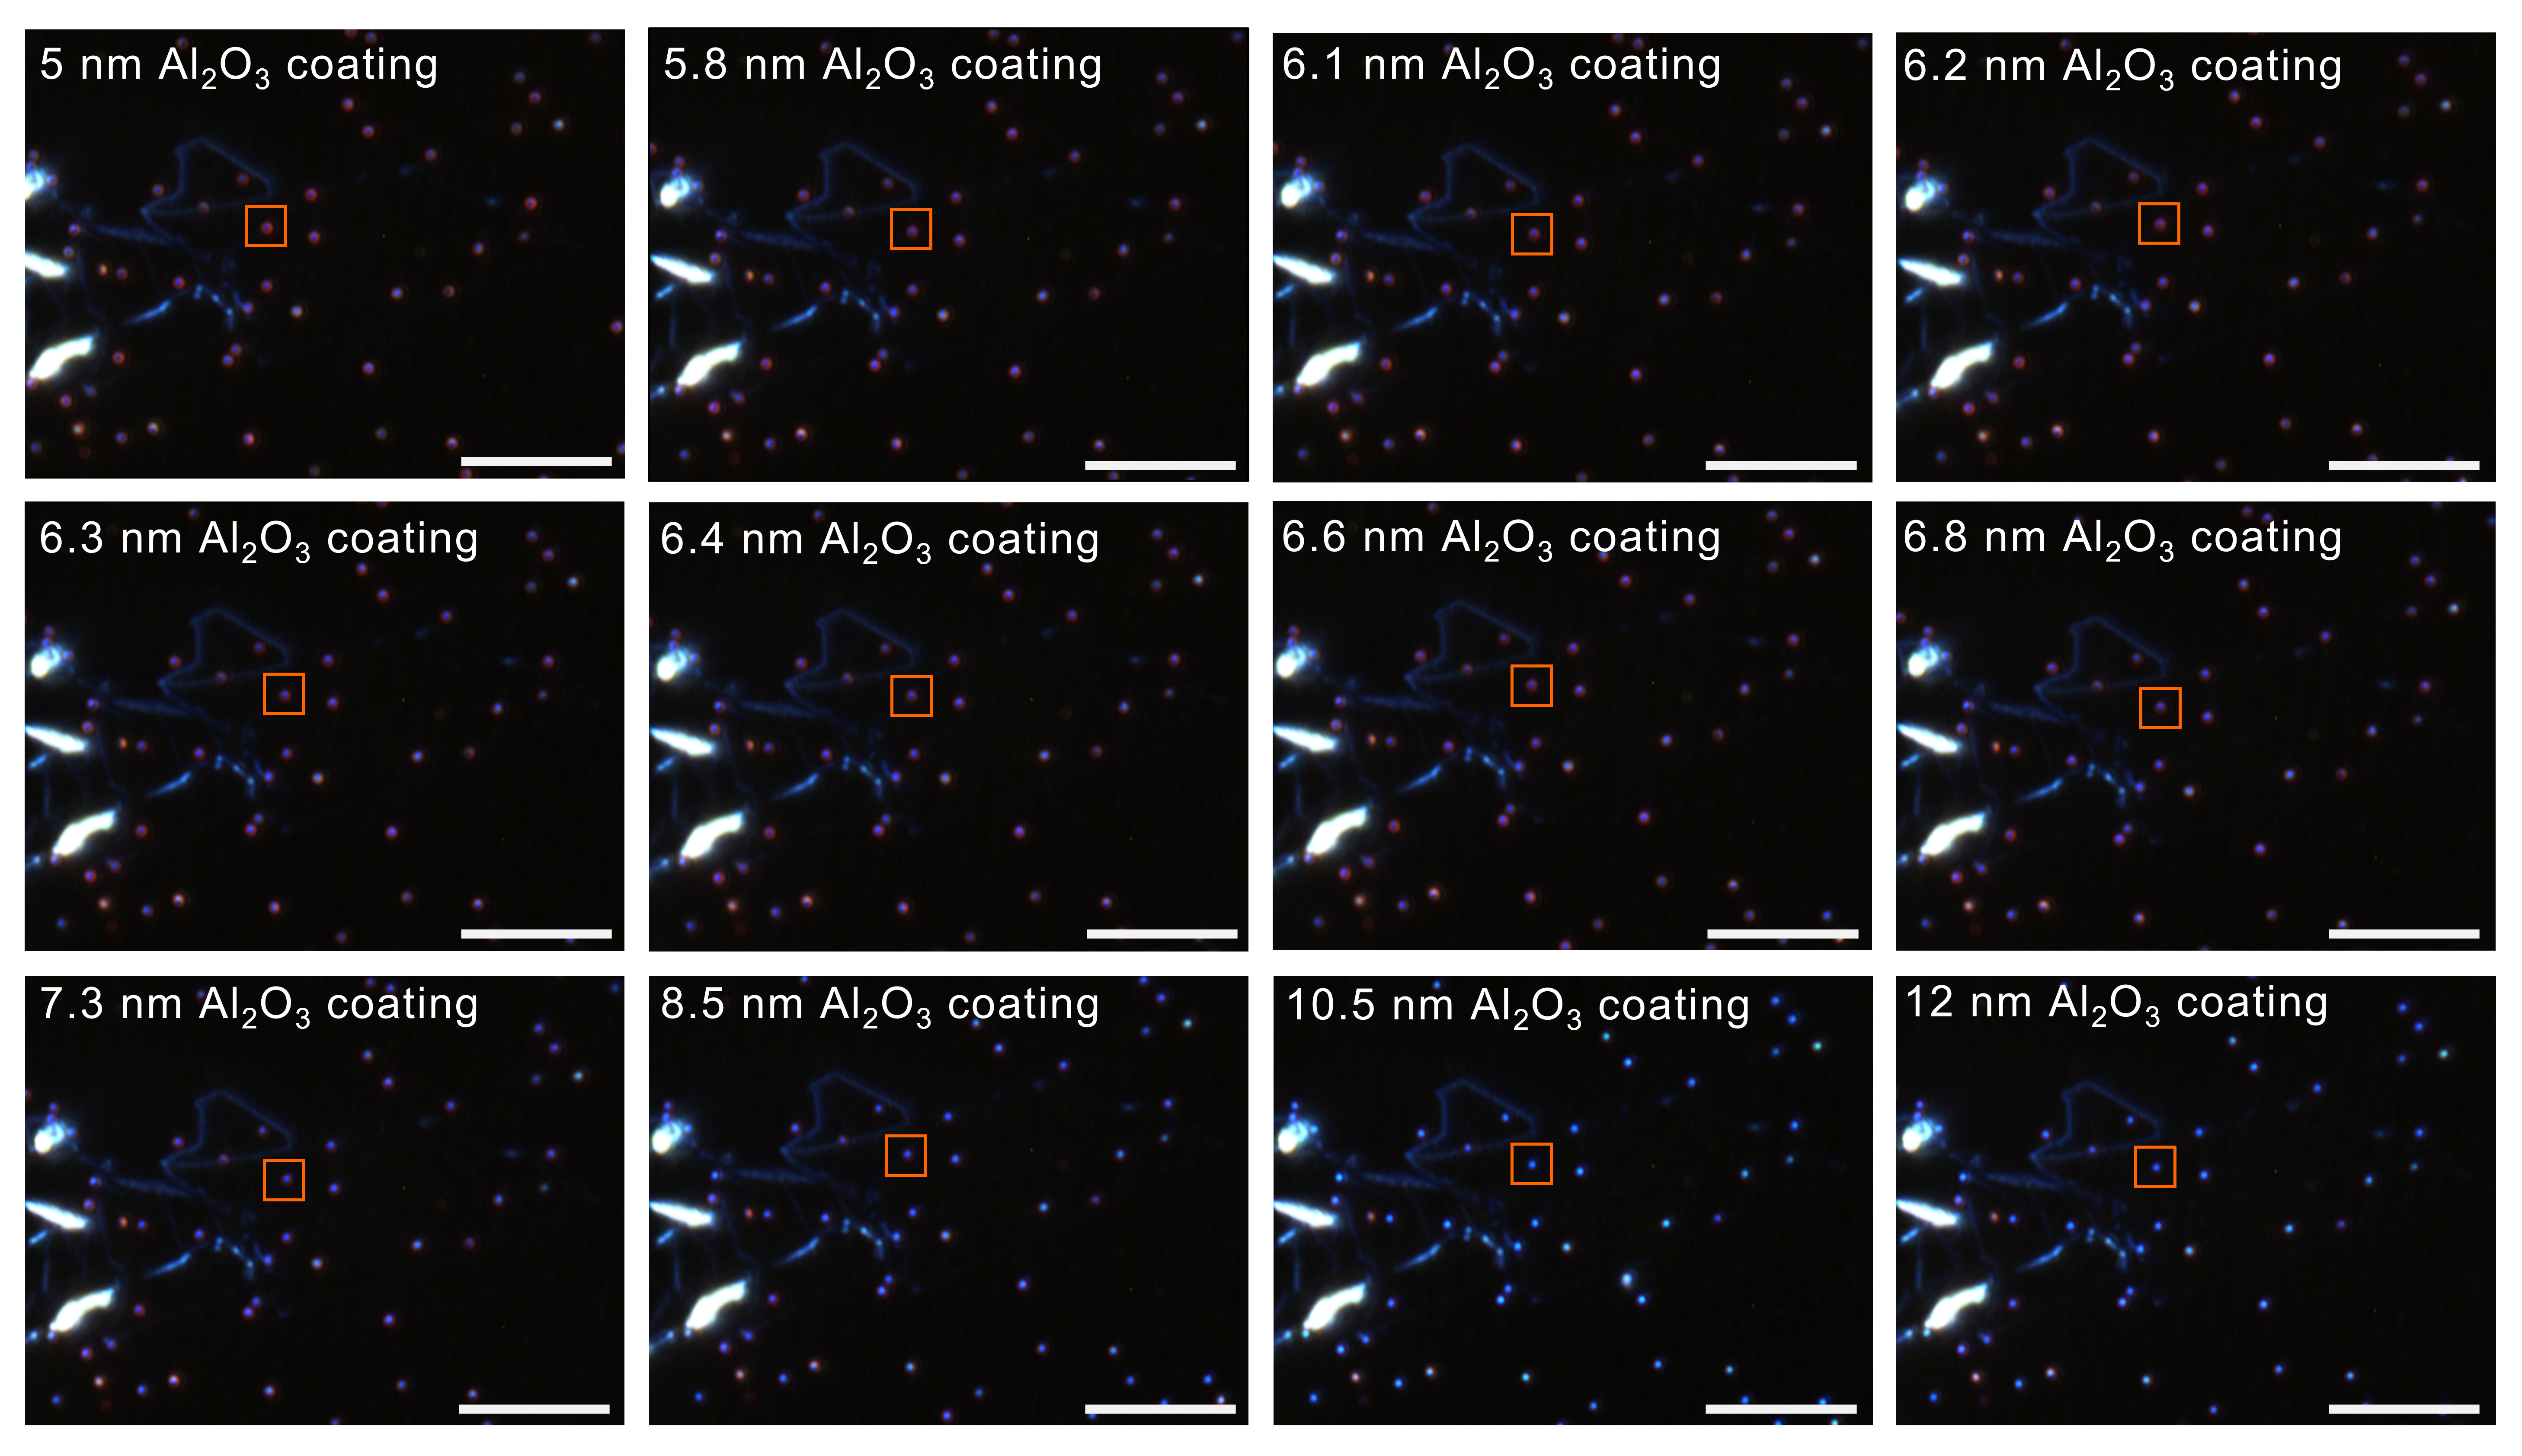


**Fig. S4.** Dark-field scattering images of 1L-MoS2-NCOM with different thickness of Al2O3 layer coating varied from 5 to 12 nm.

**S5 Plasmonic response of 2L and 3L MoS2-NCOM**

Similarly, the plasmonic response of 2L and 3L MoS2-NCOM was characterized by the dark-field scattering spectroscopy, the dark-field images illustrate that the target nanocubes appear as a blue spot surrounded by a purple ring (**Fig. S5a**). The dark-field scattering spectra of 2L-MoS2-NCOM with 8-nm-thick coated Al2O3 under unpolarized, p-polarized, and s-polarized illumination reveals that the M mode is located at 744 nm (**Fig. S5c**). The coincidence of the resonance wavelength under p-polarized, and s-polarized indicates that the nanocube has an equal edge length of 61.6 nm, characterized by the SEM image after all the optical measurements (**Fig. S5b**). In particular, the dark-field scattering spectra of 3L-MoS2-NCOM show the splitting of the degenerated M mode**24**, located at 740 nm and 758 nm respectively, caused by an imperfect cubic shape (**Fig. S5d**). The SEM image of the measured Ag NC shows a shorter edge length of 58.7 nm and a longer edge length of 60.8 nm (**Fig. S5b**).


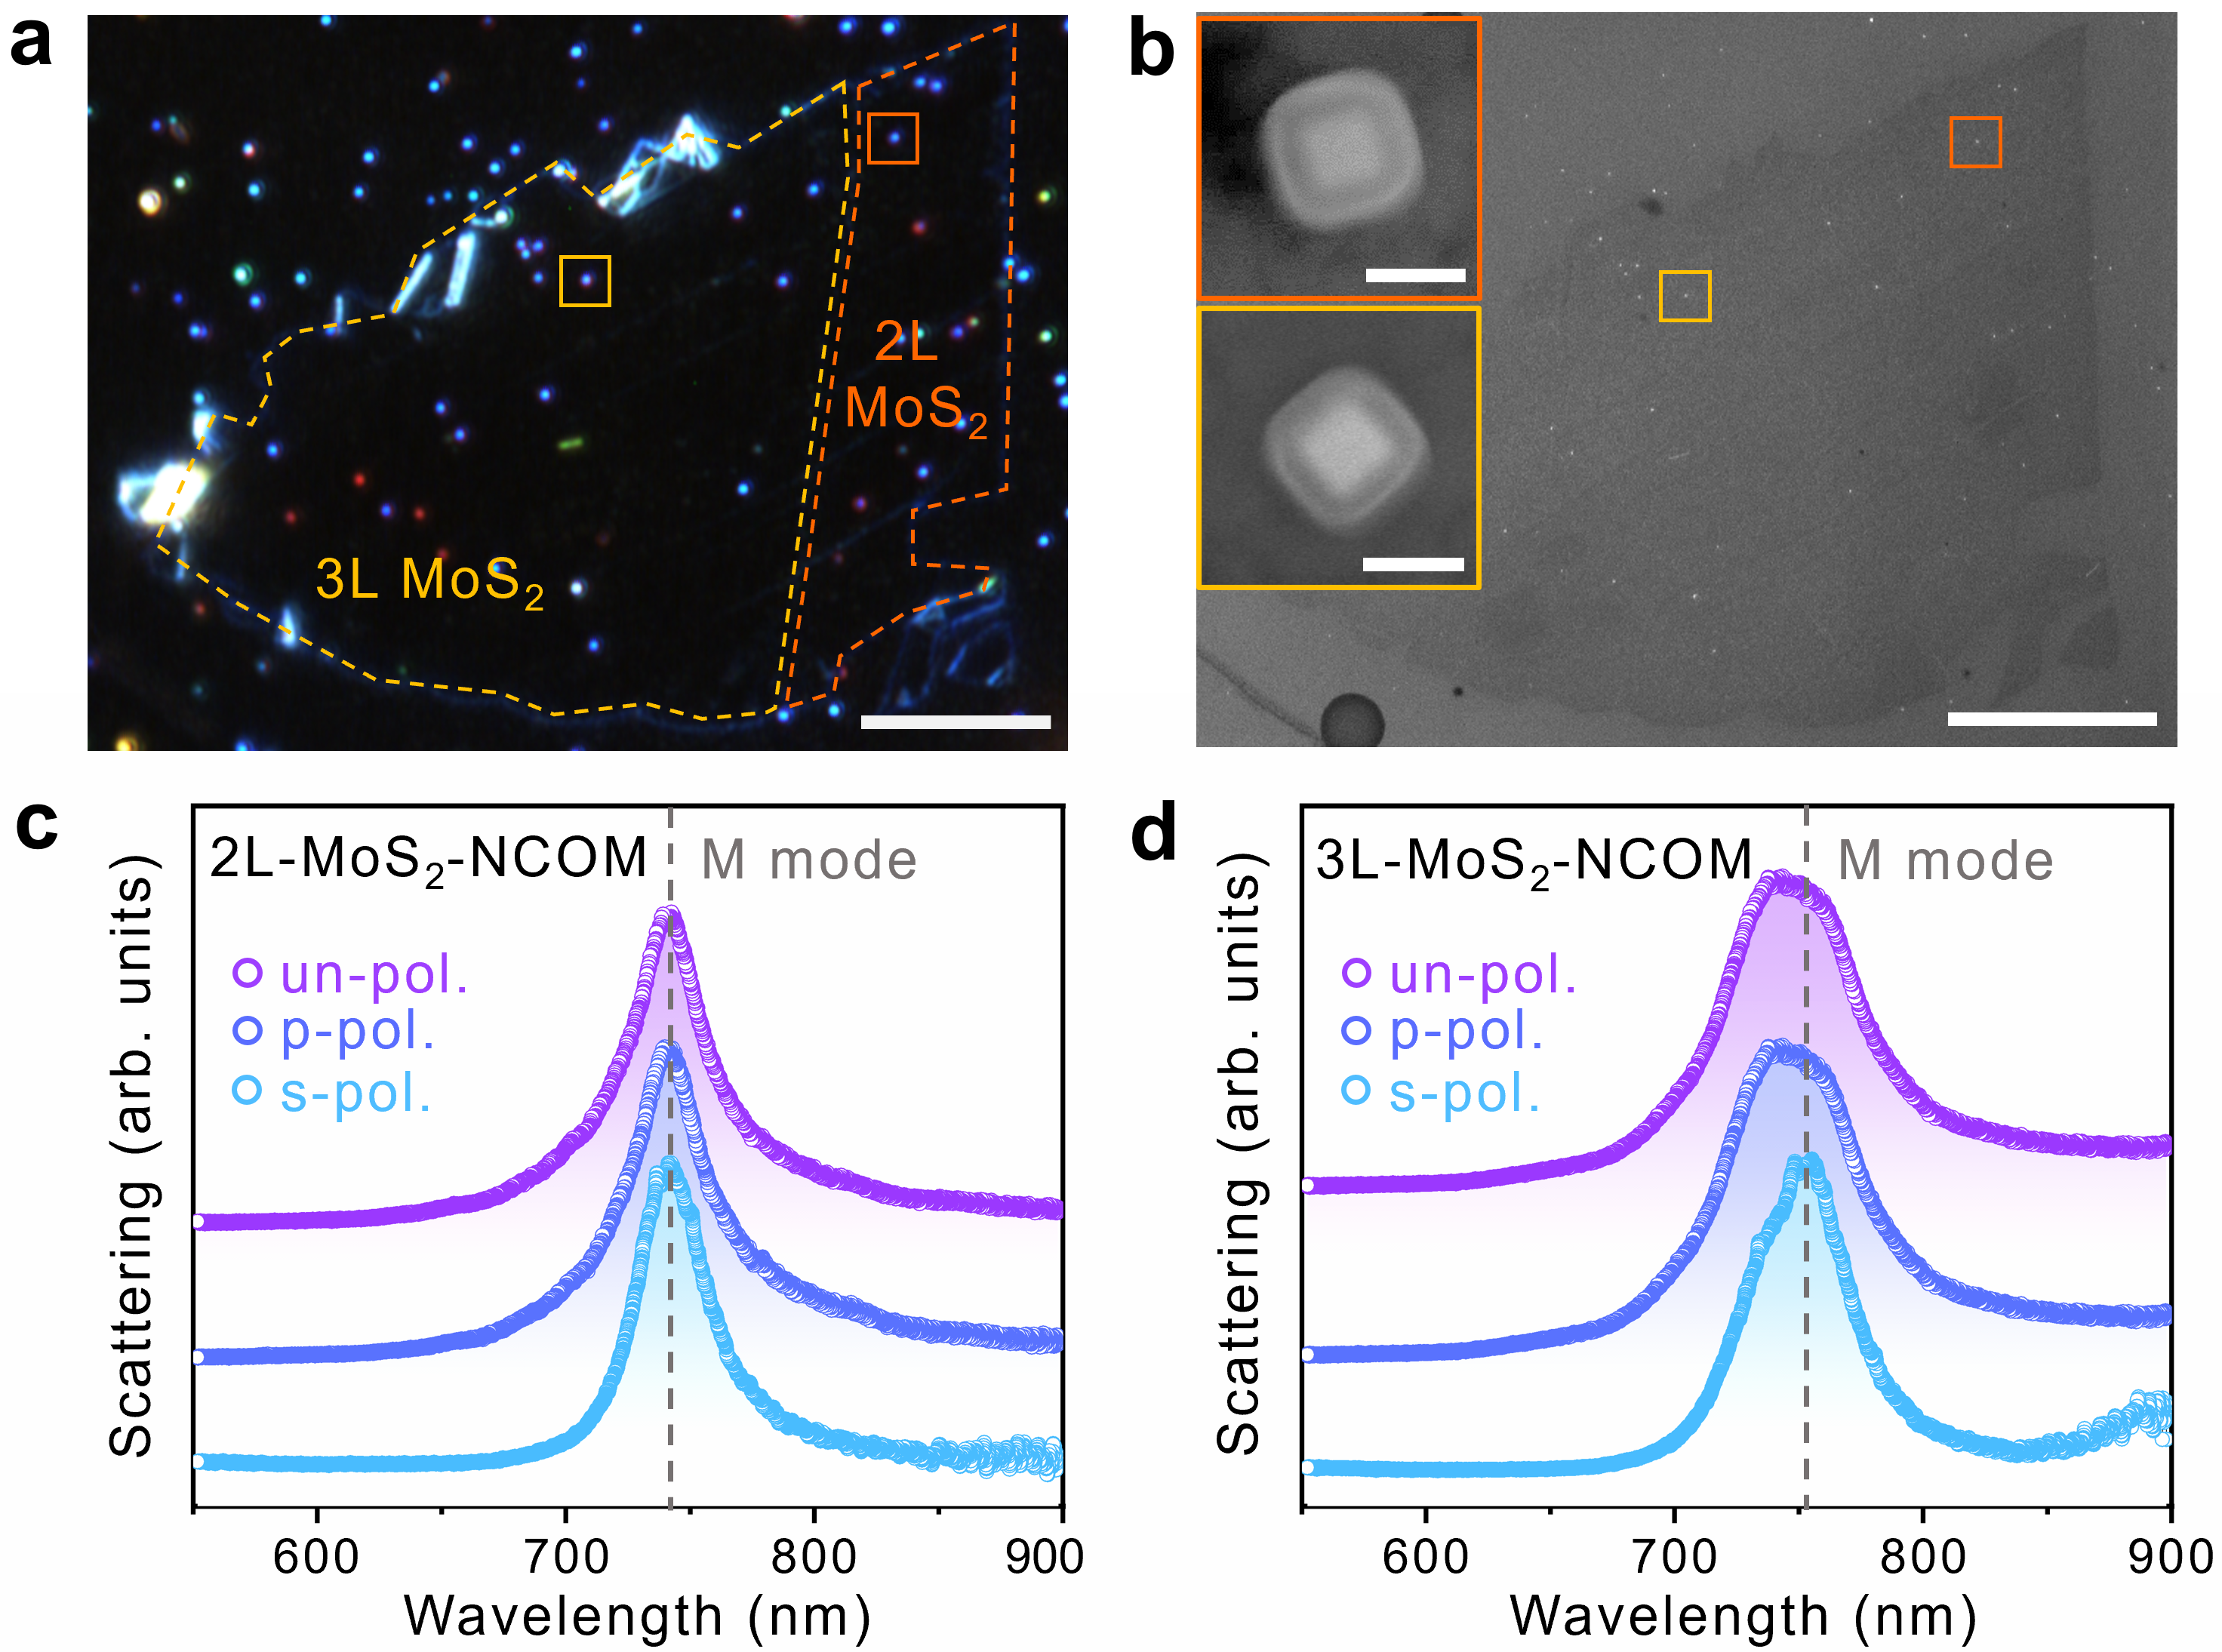


**Fig. S5.** (**a**) Dark-field scattering image of 2L and 3L MoS2-NCOM. Orange and yellow dashed lines display the boundary of 2L MoS2 and 3L MoS2, respectively. Orange and yellow squares marked the measured Ag NCOMs. The scale bar is 10 µm. (**b**) SEM images after all the optical measurements. The insets show the enlarged image of the marked Ag nanocubes. The scale bars in **b** and its inset are 10 µm and 100 nm, respectively. (**c**) and (**d**) represent the dark-field scattering spectra from 2L and 3L MoS2-NCOM, respectively. Both gray dashed lines illustrate the wavelength of the M mode.

**S6 Plasmon-scanned scattering spectra of 2 L and 3 L MoS2-NCOM**

Dark-field scattering spectra of 2L and 3L MoS2-NCOM were measured with different thicknesses of Al2O3 layers ranging from 8 to 24 nm. When the Al2O3 layers are continually deposited on samples, the wavelength of the M mode shows an apparent redshift from 743 to 825 nm on 2L-MoS2-NCOM (**Fig. S6a**). Similarly, the redder M mode redshifts from 752 to 816 nm on 3L-MoS2-NCOM, and the bluer M mode redshifts from 741 to 800 nm (**Fig. S6b**). Both wavelengths of the M mode scan across the wavelength of the excited laser and the outgoing Raman scattering with a wide range.

The gap distance of MoS2-NCOM samples is adjusted by the number of MoS2 layers. The increasing gap distance will result in the blue-shift of the M mode, but the high refractive index of few MoS2 layers causes the red-shift. Thus, the wavelength of the M mode is close to each other on 1L, 2L, and 3L MoS2-NCOM samples, the indirect band gap of 2L and 3L MoS2 does not influence the plasmonic response. This reveals a high comparability to study the plasmonic field enhancement from different MoS2-NCOM samples.


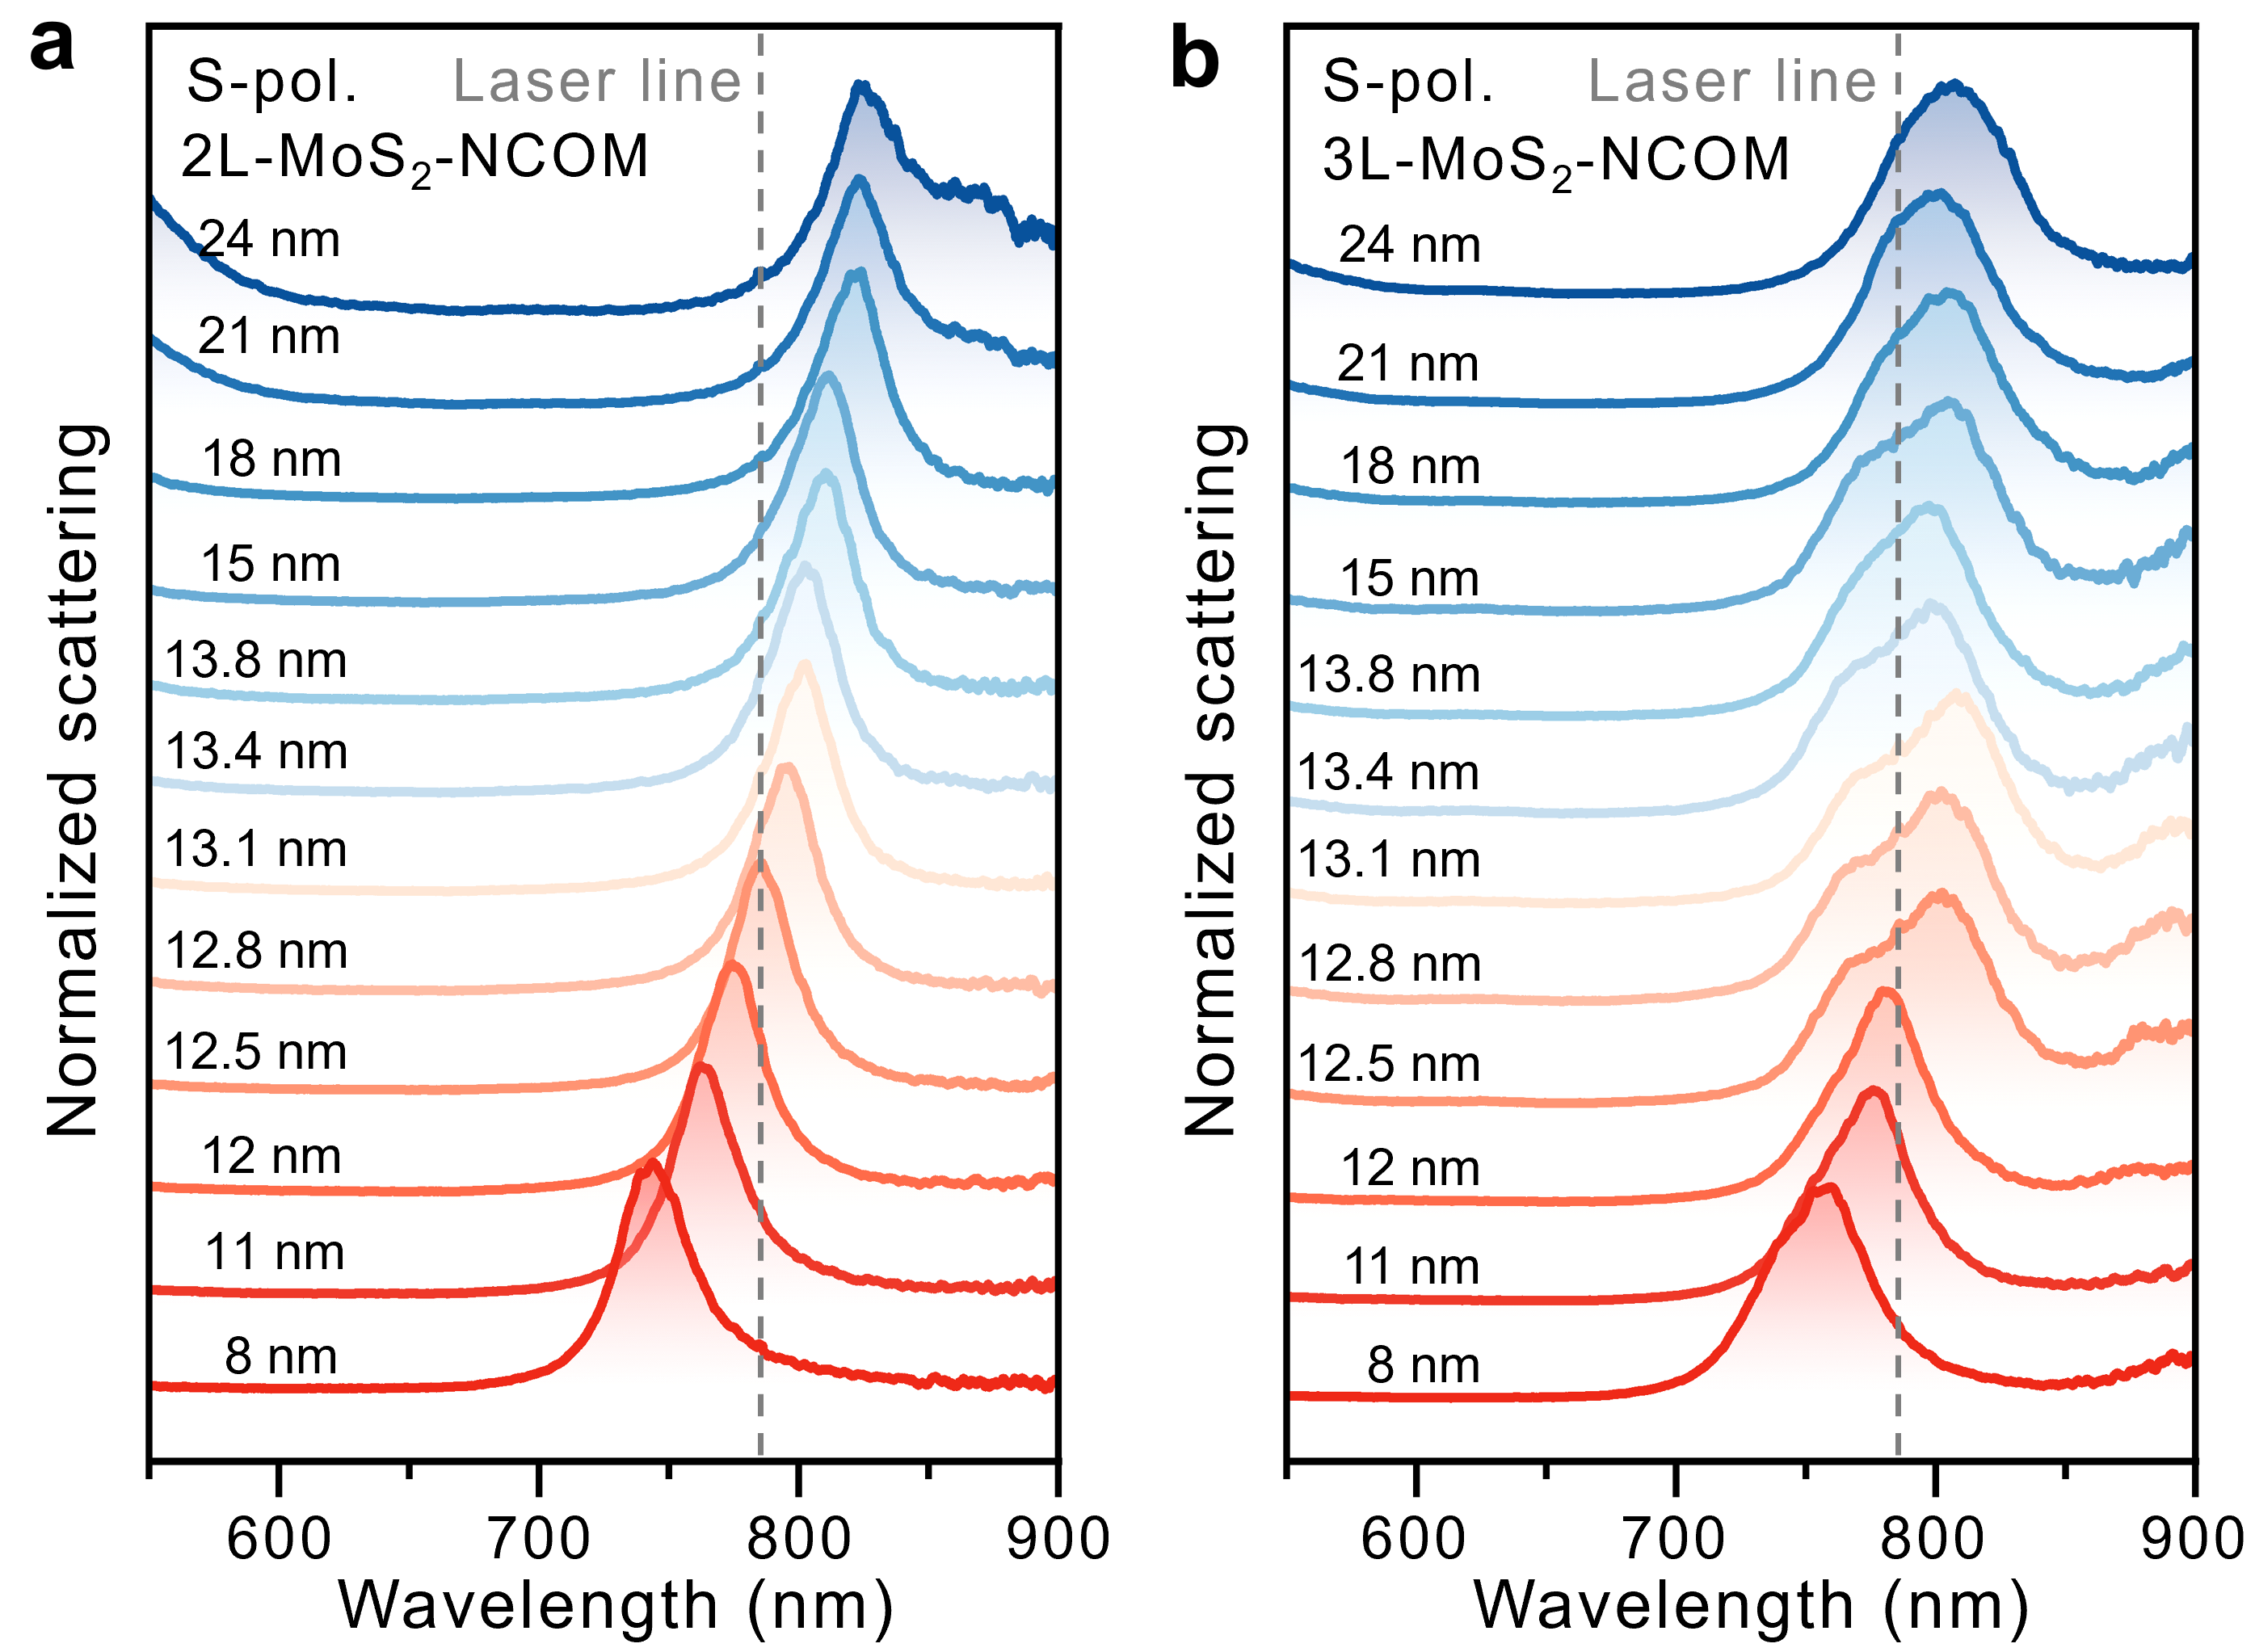


**Fig. S6.** Experimental dark-field scattering spectra for 2L-MoS2-NCOM (**a**) and 3L-MoS2-NCOM (**b**) with different thickness of Al2O3 layers varied from 8 to 24 nm. Both gray dashed lines display the laser line of 785 nm.

**S7 Calibration of SERS *EF***

Two reference Raman spectra of MoS2 were collected from a 0.5-nm-thick Al2O3 coated Ag film (bg 1) and quartz (bg 2) (**Fig. S7a** and **S7b**). The Raman spectra displayed two characteristic peaks, i.e., out-of-plane mode around 385 cm-1 and in-plane mode around 404 cm-1. Other phonon modes, such as 2LA around 450 cm-1 and around 460 cm-1, were also observed but not considered in this work.


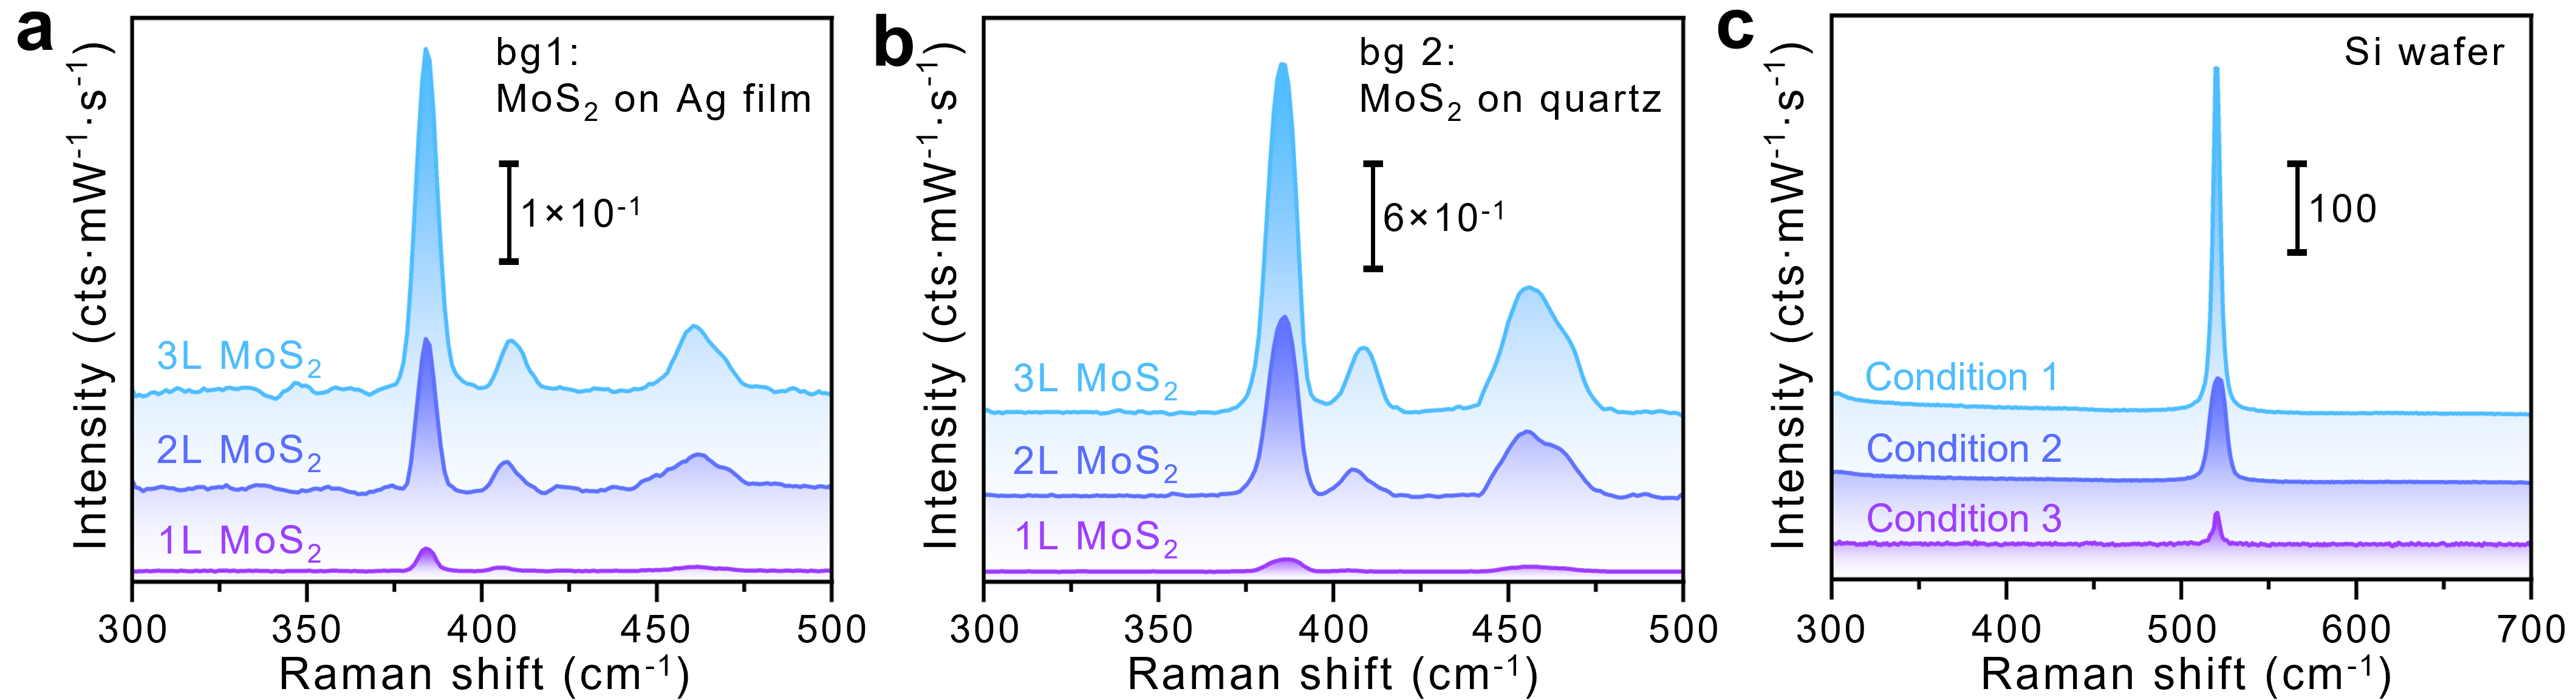


**Fig. S7.** Raman scattering spectra of MoS2 layers collected from 0.5-nm-thick coated Ag film (bg 1) (**a**) and quartz (bg 2) (**b**). (**c**) Raman scattering spectra of pure silicon under three collection conditions.

To exclude the system deviations while measuring the SERS intensity  and Raman intensity , the Raman intensity of silicon was measured as correction using three conditions (**Fig. S7c**). Condition 1 represents the measured condition of bg 1, the collection area is 121.5 μm2, the laser power is 20 mW, and the size of the laser beam is 148.7 μm2. Condition 2 represents the measured condition of bg 2, the collection area is 105.5 μm2, the laser power is 20 mW, and the size of the laser beam is 148.7 μm2. Condition 3 represents the measured condition of SERS, the collection area is 3.2 μm2, the laser power is 0.7 mW, and the size of the laser beam is 60.7 μm2. Thus, and  are described as follows:

(1)

(2)

where () is the counts of Raman intensity of MoS2 collected from MoS2-NCOM (reference), () is the laser power irradiated on MoS2-NCOM (reference), () is the size of laser beam on MoS2-NCOM (reference), () is the collection area on MoS2-NCOM (reference), () is the integration time on MoS2-NCOM (reference), which is set to 60 s (3000 s for 1L MoS2 probe, 1800 s for 2L MoS2 probe, and 1200 s for 3L MoS2 probe). is an identical integration time for the pure silicon, set to 10 s. are the counts of the Raman intensity of silicon collected under Condition 3. are the counts of the Raman intensity of silicon collected under Condition 1 or Condition 2.

After the correction, the averaged SERS *EF* is described as follows:

(3)

all mentioned experimental SERS *EF*s in the text were calculated by eq. (3).

**S8 Optimization of simulated geometry**

We characterized the 1L-MoS2-NCOM with 14-nm-thick Al2O3 layers through the focus iron beam slicing and the HR-TEM image. The area of interest was deposited with a 300-nm-thick platinum layer using electron beam deposition, followed by the few micrometers thick platinum layer coating using ion beam deposition. The area including an individual MoS2-NCOM was milled to the 7-μm-thick membrane by the focus ion beam. The membrane was lifted out from the sample, mounted on a TEM copper grid, and thinned to ~100 nm to perform the HR-TEM characterization.

As shown in **Fig. S8a**, we found that the Al2O3 layers gradually varied around the nanocubes, related to the flowing gas at different locations. During the coating process, the flowing gas is suppressed while passing the corner between nanocubes and Ag film, resulting in the thin Al2O3 layers. The thickness of Al2O3 layers around the side wall monotonously decreases from top to bottom, and the top shows the given thickness of Al2O3 layers in ALD.


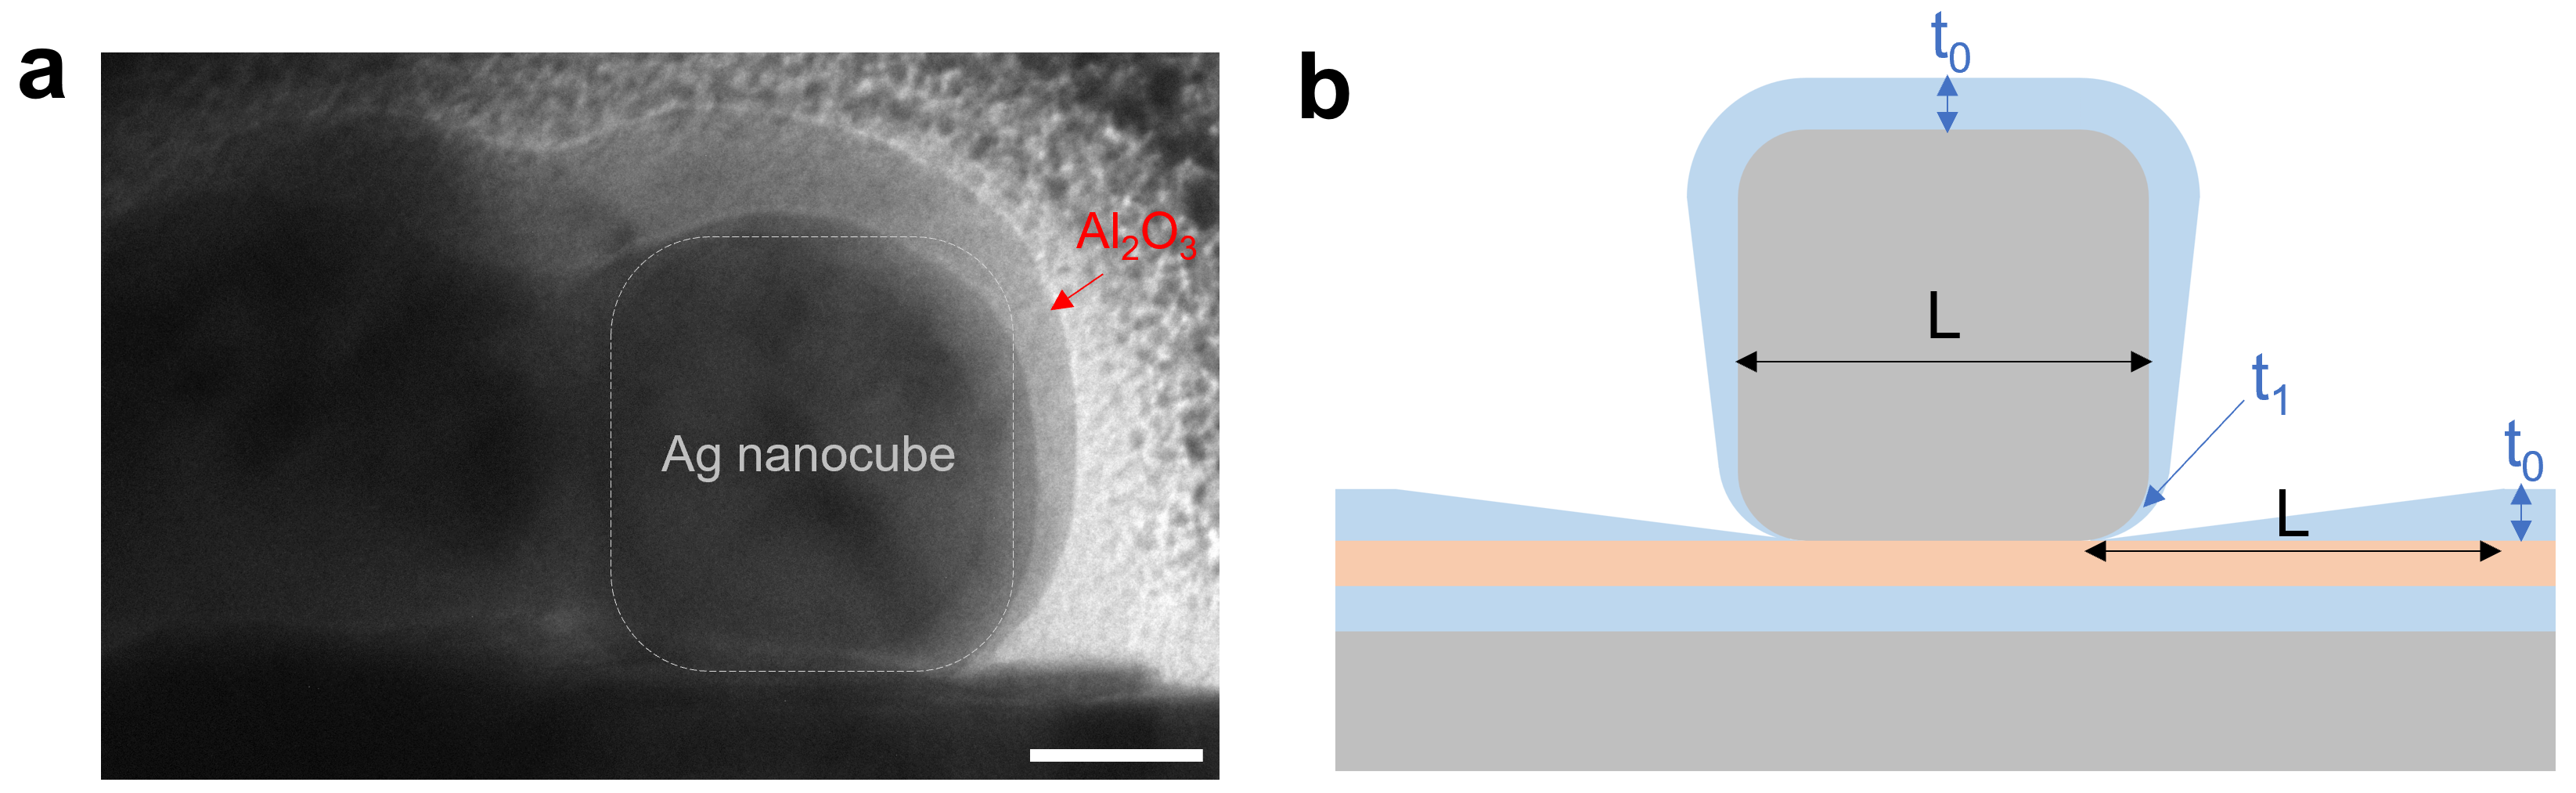


**Fig. S8.** (**a**) A representative TEM image of 1L-MoS2-spaced NCOM cross-section. The scale bar is 50 nm. (**b**) An established simulated geometry in COMSOL software, marked with the stated parameters. L represents the edge length of the nanocube, t0 represents the given thickness grown in ALD, and t1 represents the thinnest thickness at the corner.

We reproduced the geometry with the growth of Al2O3 coating in simulation (**Fig. S8b)**. Compared with the side walls of the nanocube, the top is coated with 14-nm-thick Al2O3 layers, equaling the given thickness in ALD. The thickness of Al2O3 gradually reduces to zero at the touching point at the bottom of the nanocube. Also, the coating thickness onto the MoS2 decreases to zero within one edge length of the nanocube. Under the geometry, the simulated scattering spectra with the varied wavelength of M mode agree well with the experimental results, especially in the rate of wavelength shift against the thickness of Al2O3 layers.

**S9. Simulated maximum vertical excitation and emission enhancement**

The radiation power was integrated on a spherical surface corresponding to the numerical aperture of the used objective. The emission enhancement was calculated by placing a z-polarized dipole (emitting at 810 nm) in the plane of MoS2, when is 800 nm. The position of the emitter is scanned in a step of 1 nm in a quarter of the bottom facet of the cube. Maximum emission enhancement is found when the dipole is positioned at the corner under the cube**24**.

The maximum excitation enhancement presents a maximum enhancement of 3.29×106 times at the excited wavelength (785 nm) (**Fig. S9**). The maximum emission enhancement reaches the maximum enhancement of 2.21×105 times at the outgoing Raman wavelength (810 nm), which is one order of magnitude smaller than , analogous to the previous work**25**.


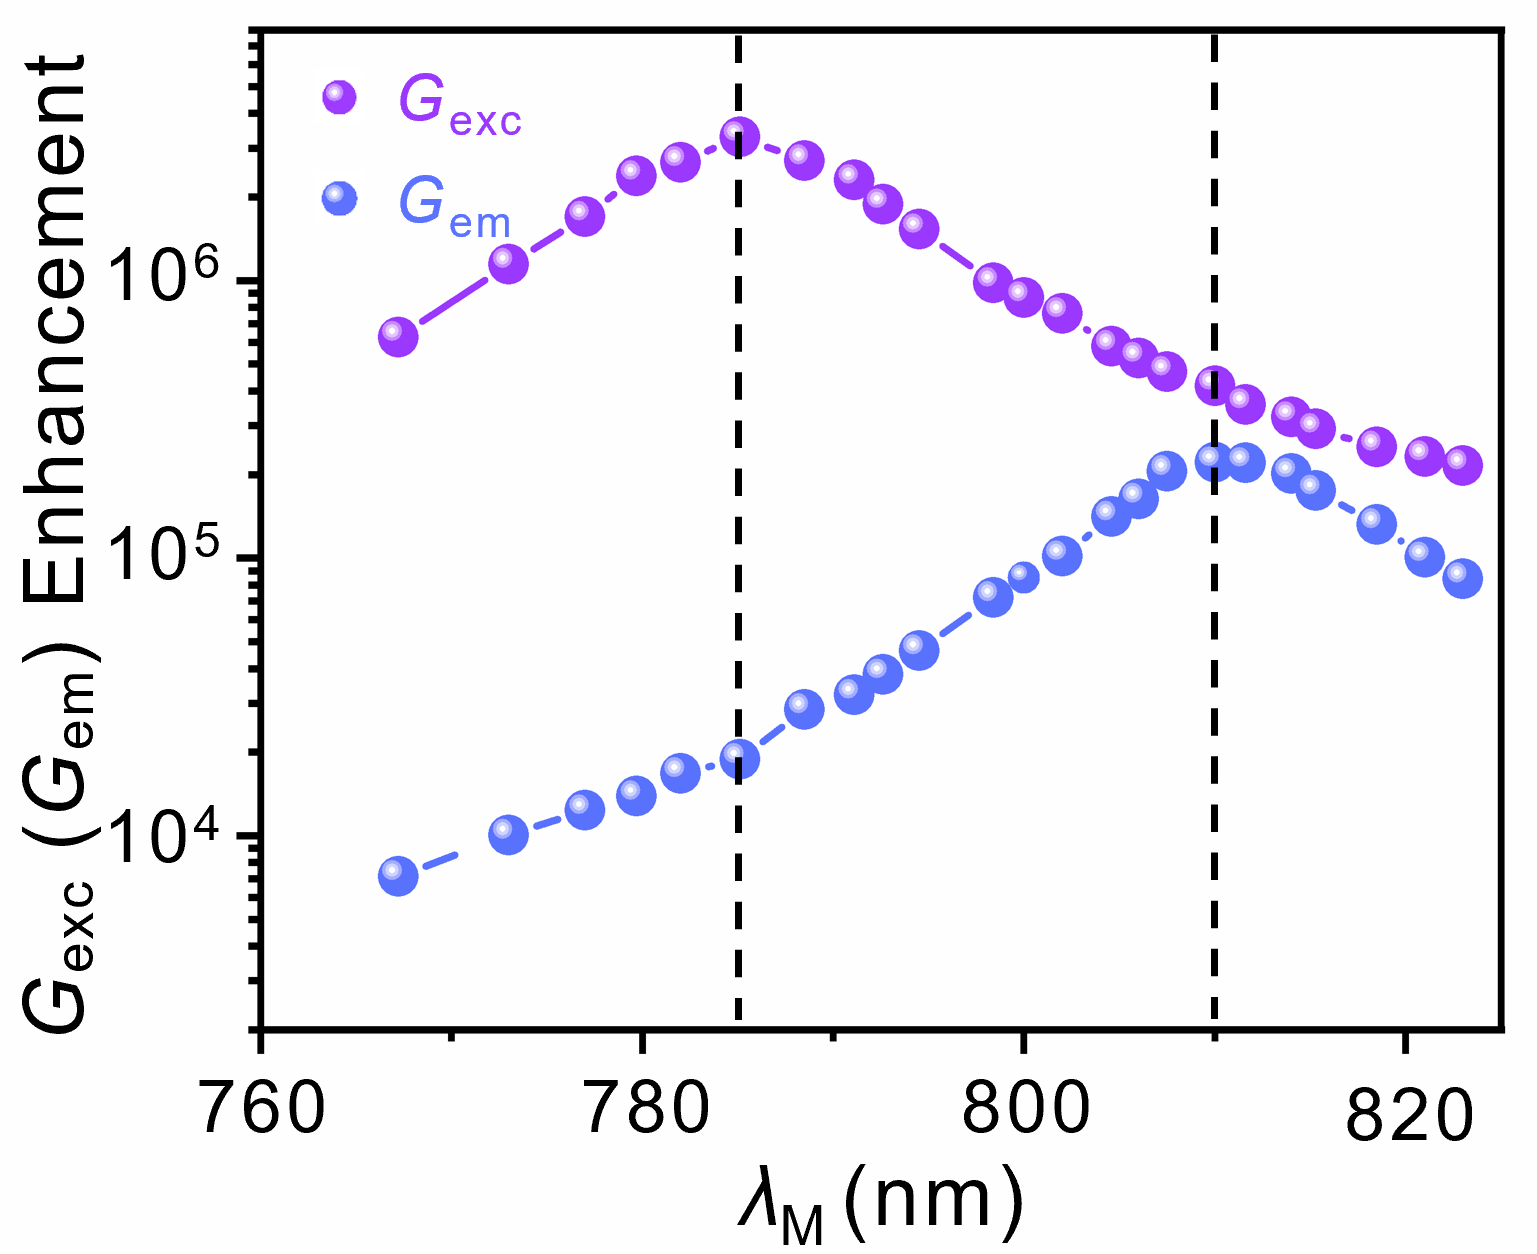


**Fig. S9.** The simulated maximum excitation enhancement, emission enhancement, when is shifted.

**S10. Probing horizontal SERS *EF* and field enhancement**

Here, we simply determined the horizontal effective “hot spots” area under the E4 model, by integrating the contribution from the hottest region in the central plane of MoS2 until the fraction reaches 1-e-5 (~99.3%). The effective ‘hot spots’ area is 1902 nm² (**Fig. S10a**).

As *λ*M gradually redshifts, the experimental SERS increases rapidly, then reaches a maximum value of 4.6×108 times (bg 1) and 6.13×107 times (bg 2)between the excited wavelength and the outgoing Raman wavelength, eventually drops (**Fig. S10b)**. The small dips were observed after the maximum SERS , which similarly exists in the experimental SERS . The experimental horizontal field enhancement over the ‘hot area’ monotonically increases with the number of MoS2 layers decreasing. It is 47 times for 2 L MoS2 and 25 times for 3L MoS2, respectively. When the number of MoS2 layers decreases to monolayer, the experimental average horizontal field enhancement reaches a maximum of 88 times (**Fig. S10c)**.


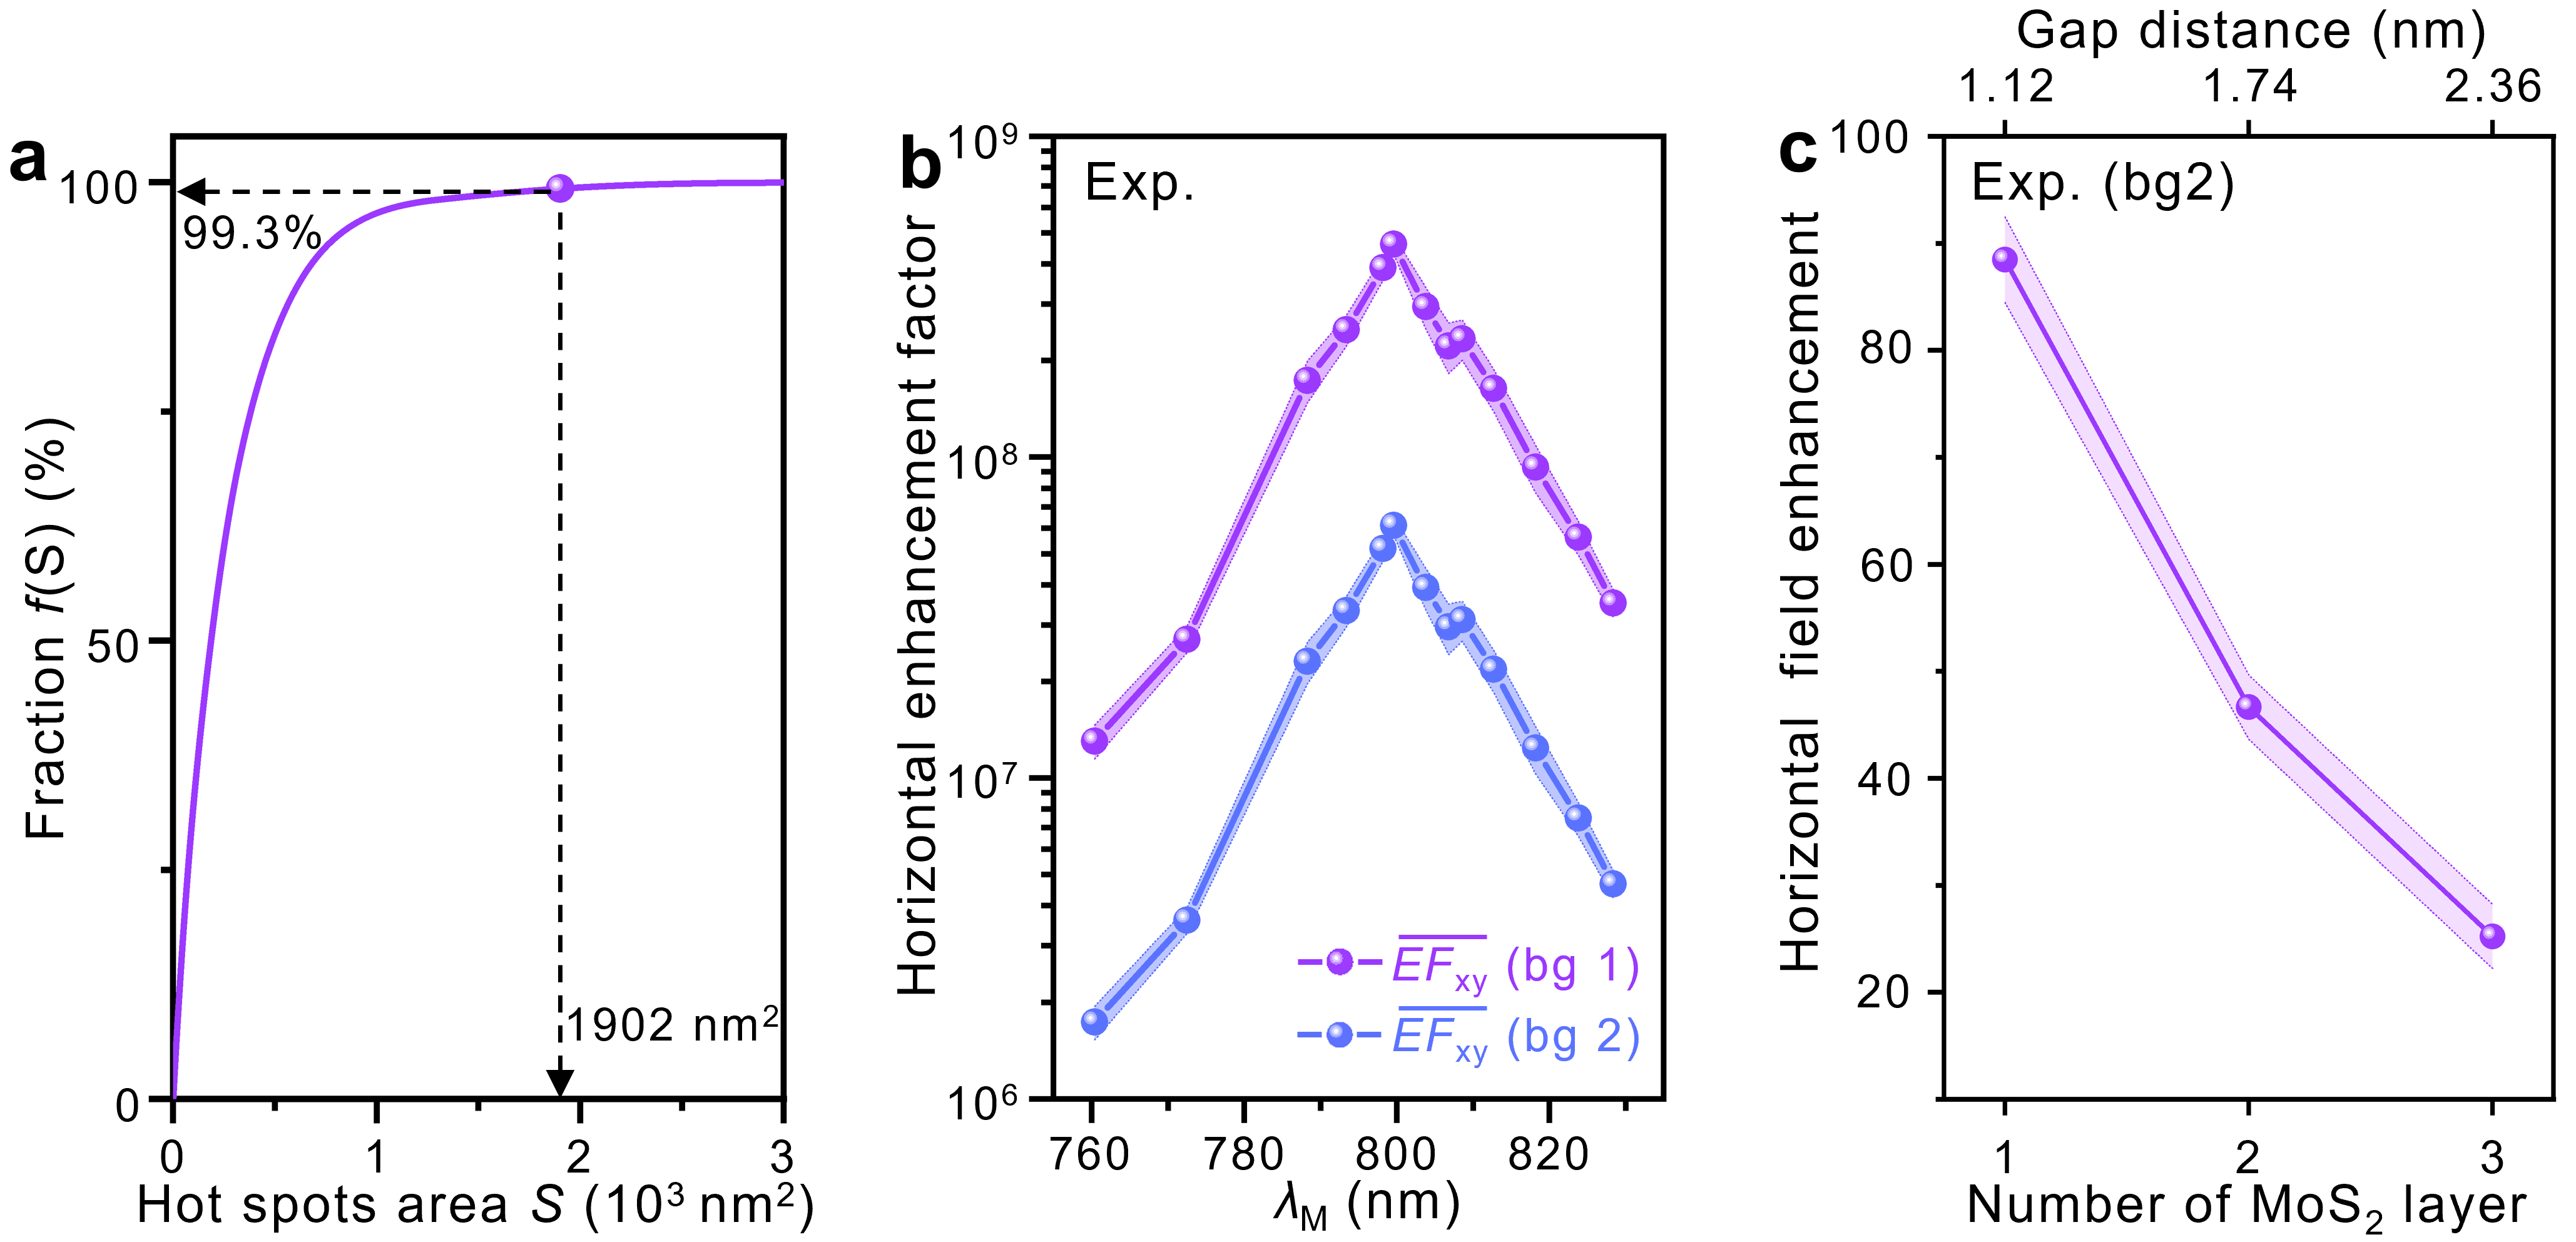


**Fig. S10.** (**a**) Fraction as the ratio of integration of hot spots area over total hot spots area for the horizontal field component. The highlighted point marks the determined effective hot spot area. (**b**)Experimental SERS with the vaired using bg 1 and bg 2 as references. (**c**) Experimental layer-dependent horizontal field enhancement. All colorful strips represent the corresponding error bar.

**S11.** **Statistics of typical SERS *EF***


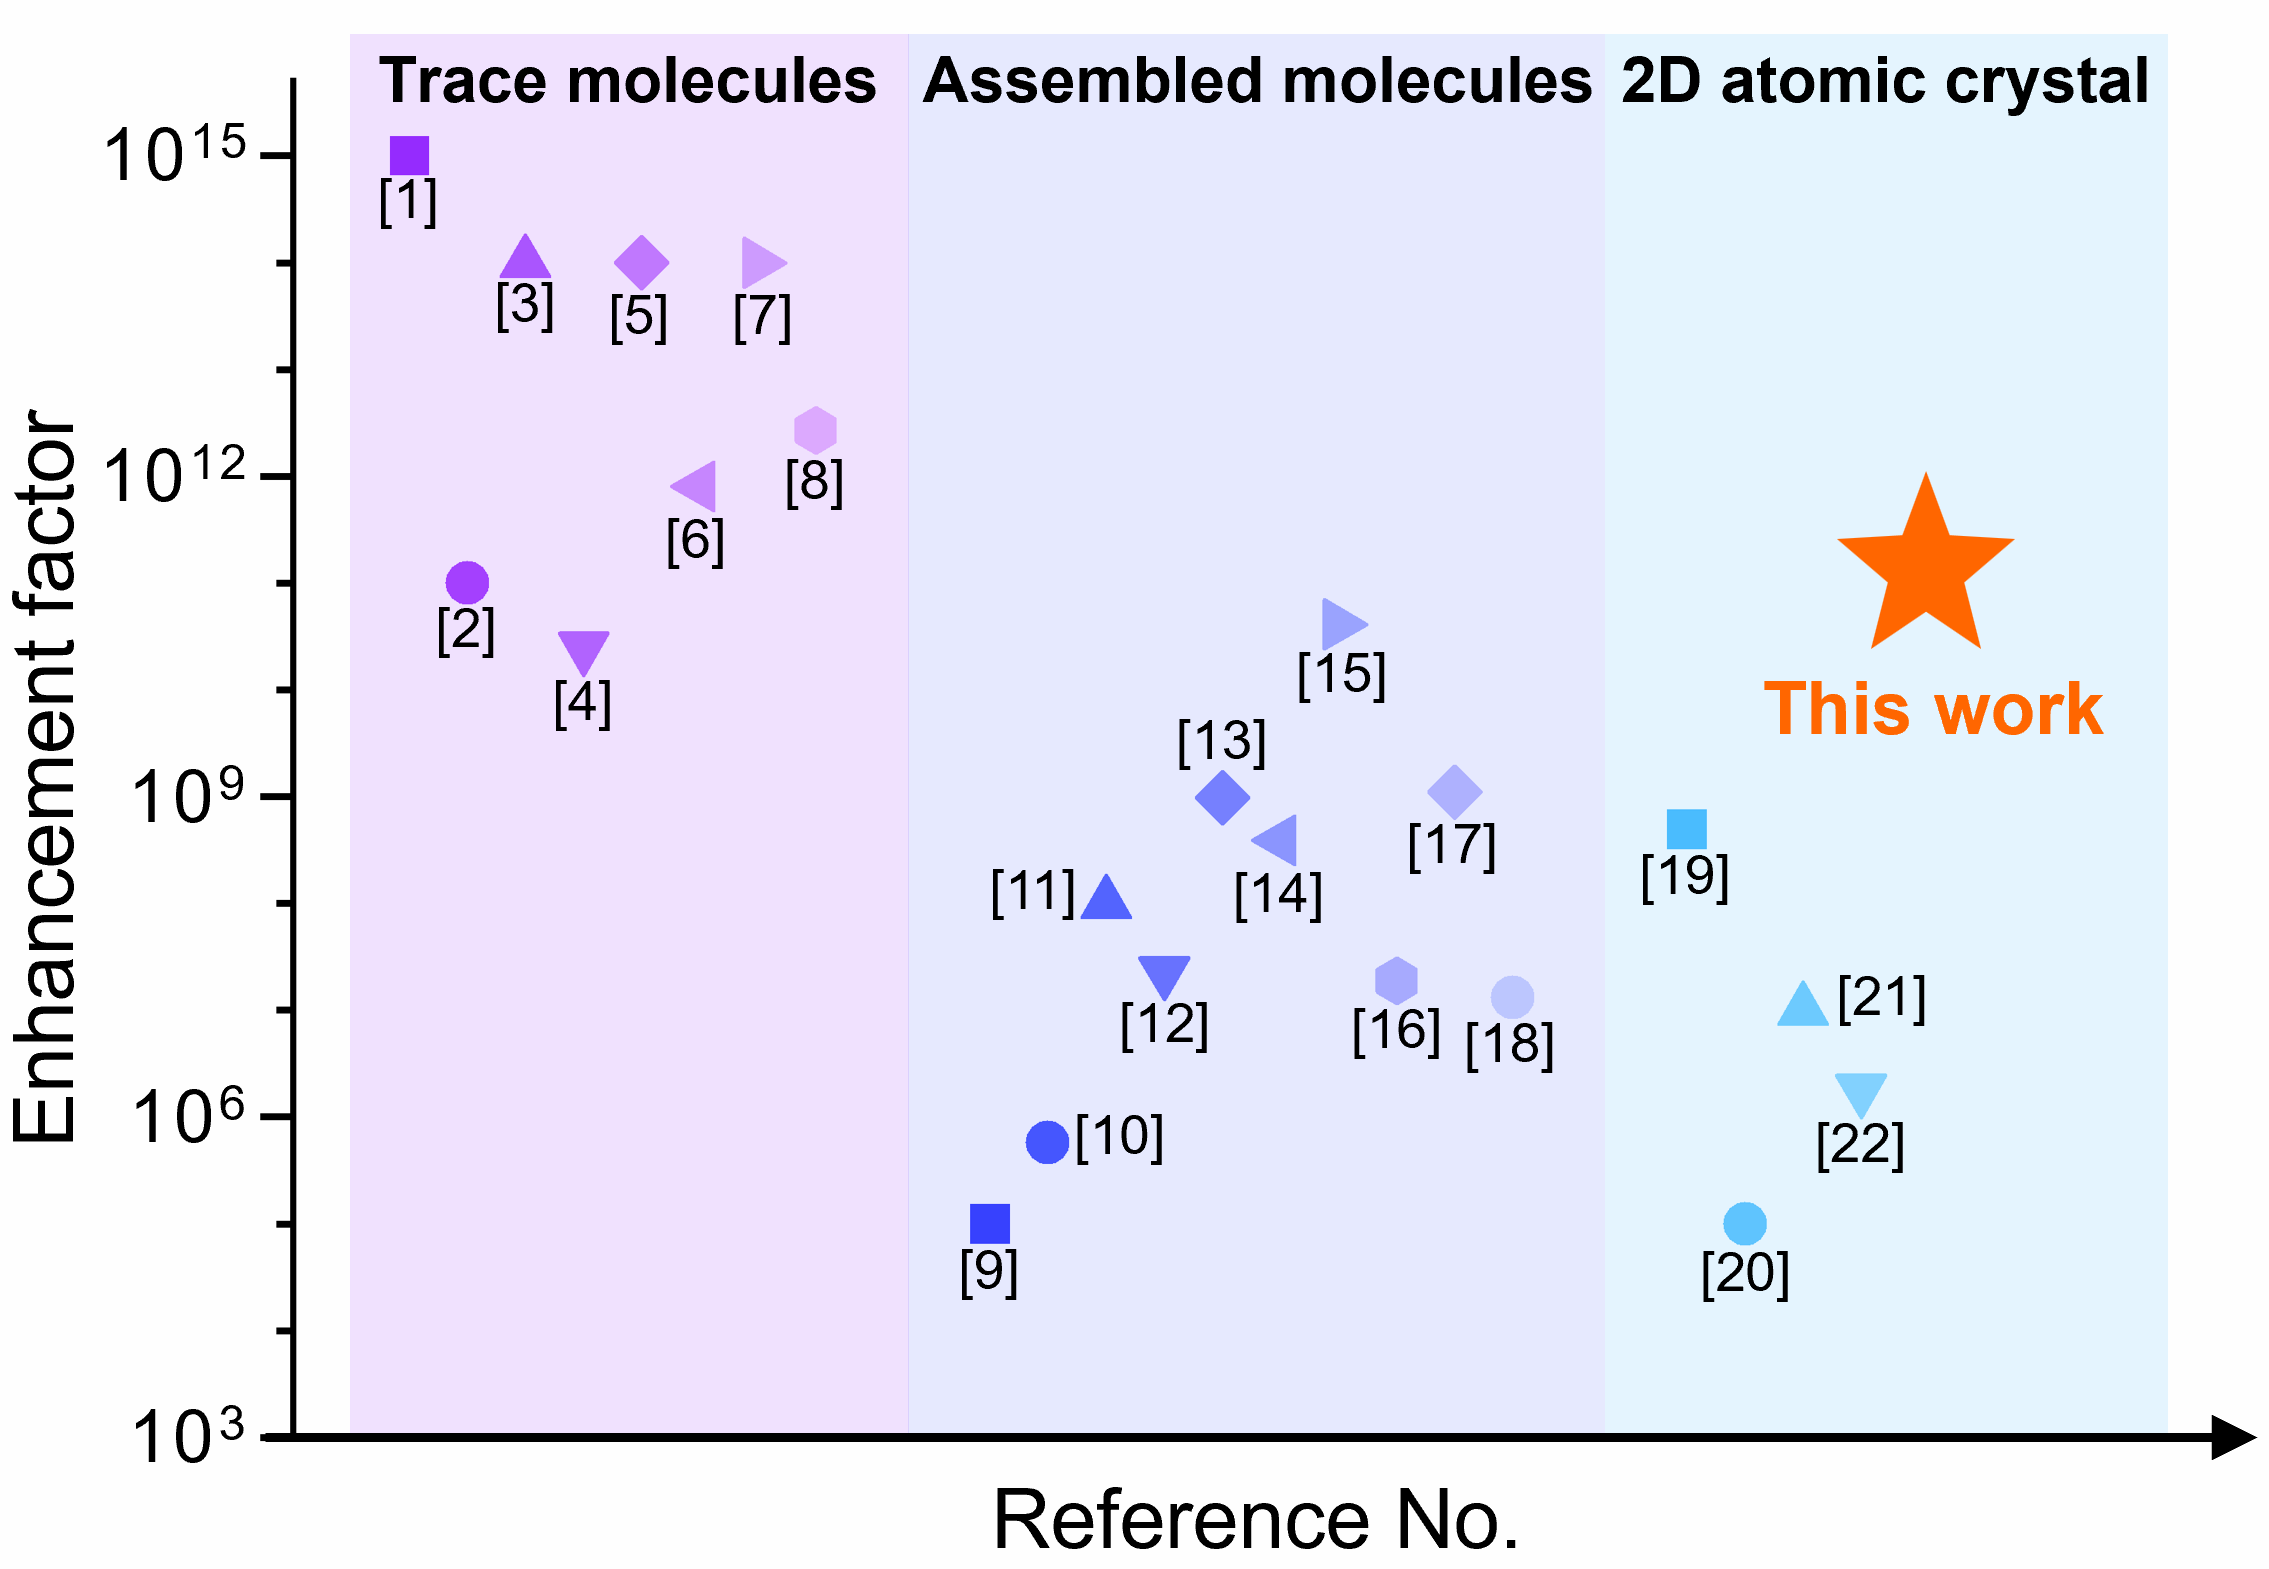


**Fig. S11.** Corresponding references**1-22** are listed below one by one.

1 Nie, S. & Emory, S. R. Probing Single Molecules and Single Nanoparticles by Surface-Enhanced Raman Scattering. *Science* **275**, 1102-1106 (1997).

2 Kneipp, K. et al. Single Molecule Detection Using Surface-Enhanced Raman Scattering (SERS). *Phys. Rev. Lett.* **78**, 1667-1670 (1997).

3 Kneipp, K. *et al.* Detection and identification of a single DNA base molecule using surface-enhanced Raman scattering (SERS). *Phys. Rev. E* **57**, R6281-R6284 (1998).

4 Xu, H. X., Bjerneld, E. J., Käll, M. & Börjesson, L. Spectroscopy of single hemoglobin molecules by surface enhanced Raman scattering. *Phys. Rev. Lett.* **83**, 4357-4360 (1999).

5 Kneipp, K., Kneipp, H. & Kneipp, J. Surface-Enhanced Raman Scattering in Local Optical Fields of Silver and Gold NanoaggregatesFrom Single-Molecule Raman Spectroscopy to Ultrasensitive Probing in Live Cells. *Acc. Chem. Res.* **39**, 443-450 (2006).

6 Le Ru, E. C., Blackie, E., Meyer, M. & Etchegoin, P. G. Surface Enhanced Raman Scattering Enhancement Factors:  A Comprehensive Study. *J. Phys. Chem. C* **111**, 13794-13803 (2007).

7 Kleinman, S. L.et al. Single-Molecule Surface-Enhanced Raman Spectroscopy of Crystal Violet Isotopologues: Theory and Experiment. *J. Am. Chem. Soc.* **133**, 4115-4122 (2011).

8 Lim, D.-K., Jeon, K.-S., Kim, H. M., Nam, J.-M. & Suh, Y. D. Nanogap-engineerable Raman-active nanodumbbells for single-molecule detection. *Nat. Mater.* **9**, 60-67 (2009).

9 Hildebrandt, P. & Stockburger, M. Surface-Enhanced Resonance Raman-Spectroscopy of Rhodamine-6g Adsorbed on Colloidal Silver. *J. Phys. Chem.* **88**, 5935-5944 (1984).

10 Freeman, R. G.et al*.* Self-Assembled Metal Colloid Monolayers: An Approach to SERS Substrates. *Science* **267**, 1629-1632 (1995).

11 Wang, H., Levin, C. S. & Halas, N. J. Nanosphere Arrays with Controlled Sub-10-nm Gaps as Surface-Enhanced Raman Spectroscopy Substrates. *J. Am. Chem. Soc.* **127**, 14992-14993 (2005).

12 Orendorff, C. J., Gearheart, L., Jana, N. R. & Murphy, C. J. Aspect ratio dependence on surface enhanced Raman scattering using silver and gold nanorod substrates. *Phys. Chem. Chem. Phys.* **8**, 165-170 (2006).

13 McFarland, A. D., Young, M. A., Dieringer, J. A. & Van Duyne, R. P. Wavelength-Scanned Surface-Enhanced Raman Excitation Spectroscopy. *J. Phys. Chem. B* **109**, 11279-11285 (2005).

14 Camden, J. P. et al. Probing the structure of single-molecule surface-enhanced Raman scattering hot spots. *J. Am. Chem. Soc.* **130**, 12616-12617 (2008).

15 Fang, Y., Seong, N.-H. & Dlott, D. D. Measurement of the Distribution of Site Enhancements in Surface-Enhanced Raman Scattering. *Science* **321**, 388-392 (2008).

16 Li, W. *et al.* Etching and Dimerization: A Simple and Versatile Route to Dimers of Silver Nanospheres with a Range of Sizes. *Angew. Chem. Int. Ed.* **122**, 168-172 (2009).

17 Zhu, W. & Crozier, K. B. Quantum mechanical limit to plasmonic enhancement as observed by surface-enhanced Raman scattering. *Nat. Commun.* **5**, 5228 (2014).

18 Liu, K.et al. Porous Au–Ag Nanospheres with High-Density and Highly Accessible Hotspots for SERS Analysis. *Nano Lett.* **16**, 3675-3681 (2016).

19 Chen, W.et al. Probing the limits of plasmonic enhancement using a two-dimensional atomic crystal probe. *Light Sci. Appl.* **7**, 56 (2018).

20 Liu, D.et al*.* Probing the in-Plane Near-Field Enhancement Limit in a Plasmonic Particle-on-Film Nanocavity with Surface-Enhanced Raman Spectroscopy of Graphene. *ACS Nano* **13**, 7644-7654 (2019).

21 Zhang, Y.et al. Simultaneous Surface-Enhanced Resonant Raman and Fluorescence Spectroscopy of Monolayer MoSe2: Determination of Ultrafast Decay Rates in Nanometer Dimension. *Nano Lett.* **19**, 6284-6291 (2019).

22 Chen, S. et al. Extending Plasmonic Enhancement Limit with Blocked Electron Tunneling by Monolayer Hexagonal Boron Nitride. *Nano Lett.* **23**, 5445-5452 (2023).

23 Lee, C.et al. Anomalous Lattice Vibrations of Single- and Few-Layer MoS2. *ACS Nano* **4**, 2695-2700 (2010).

24 Sun, J. et al. Light-Emitting Plexciton: Exploiting Plasmon–Exciton Interaction in the Intermediate Coupling Regime. *ACS Nano* **12**, 10393-10402 (2018).

25 Rose, A.et al. Control of Radiative Processes Using Tunable Plasmonic Nanopatch Antennas. *Nano Lett.* **14**, 4797-4802 (2014).
